# Supplementary material for: Nutrient Intake and Status in Adults Consuming Plant-Based Diets Compared to Meat-Eaters: A Systematic Review
Source: MDPI journal article supplement (doi:10.3390/nu14010029), 2021-12-23
Supplement: s1 [file s1]

Table S1. Details of individual studies

| Reference           | Country   | Study population                 | Dietary pattern  | n            | Age (y)      | Age_unit     | Age variation | Age_var_unit | Reported data                                                                                                                                           | Supplements                      | Dietary assessment method    |
|---------------------|-----------|----------------------------------|------------------|--------------|--------------|--------------|---------------|--------------|---------------------------------------------------------------------------------------------------------------------------------------------------------|----------------------------------|------------------------------|
| Al Delaimy 2004     | UK        | adults                           | vegetarians      | 198          | 54.9         | mean         | 5.8           | SD           | status: vit B1, B2, B6, folate, B12.                                                                                                                    | users & non-users of supplements | n.a.                         |
| Allen 2008          | USA       | adults                           | vegetarians      | not reported | not reported | not reported | 19-50         | range        | status: vit B12                                                                                                                                         | users & non-users of supplements | n.a.                         |
|                     |           |                                  | meat-eaters      | not reported | not reported | not reported | 19-50         | range        |                                                                                                                                                         |                                  |                              |
| Alles 2017          | France    | adults                           | vegetarians      | 2370         | 48.7         | mean         | 14.7          | SD           | intake: energy, protein, fiber, PUFA, total n-3 FA, vit A, B1, B2, B6, B12, niacin, folate, C, D, E, iron, zinc, calcium, iodine, magnesium, phosphorus | foods & supplements              | 24h recall (three times)     |
|                     |           |                                  | vegans           | 789          | 48.7         | mean         | 14.7          | SD           |                                                                                                                                                         |                                  |                              |
|                     |           |                                  | meat-eaters      | 90664        | 48.7         | mean         | 14.7          | SD           |                                                                                                                                                         |                                  |                              |
| Andrich 2011        | USA       | women                            | vegetarians      | 22           | 43           | mean         | 16            | SD           | intake: energy, protein, fiber, PUFA                                                                                                                    | foods only                       | 3d food record (twice)       |
|                     |           |                                  | vegans           | 20           | 36           | mean         | 14            | SD           |                                                                                                                                                         |                                  |                              |
|                     |           |                                  | meat-eaters      | 21           | 40           | mean         | 15            | SD           |                                                                                                                                                         |                                  |                              |
| Ball 2000           | Australia | women                            | vegetarians      | 50           | 25.2         | mean         | 18-45         | range        | intake: energy, protein, fiber, total n-3 FA, EPA, DHA, iron, zinc                                                                                      | foods & supplements              | 4d weighted record (3 times) |
|                     |           |                                  | meat-eaters      | 24           | 25.3         | mean         | 18-45         | range        | status: zinc                                                                                                                                            | users & non-users of supplements |                              |
|                     |           | men                              | vegetarians      | 39           | not reported | not reported | 20-50         | range        |                                                                                                                                                         |                                  |                              |
|                     |           |                                  | meat-eaters      | 25           | not reported | not reported | 20-50         | range        |                                                                                                                                                         |                                  |                              |
|                     |           |                                  | vegans           | 10           | not reported | not reported | 20-50         | range        |                                                                                                                                                         |                                  |                              |
| Barghouti 2009      | Jordan    | adults                           | vegans           | 53           | not reported | not reported | 18-78         | range        | status: vit B12                                                                                                                                         | non-users of supplements         | n.a.                         |
|                     |           |                                  | vegetarians      | 163          | not reported | not reported | 18-78         | range        |                                                                                                                                                         |                                  |                              |
|                     |           |                                  | meat-eaters      | 785          | not reported | not reported | 18-78         | range        |                                                                                                                                                         |                                  |                              |
| Bedford 2005        | Canada    | adults                           | vegetarians      | 106          | 41.5         | mean         | 1.8           | SD           | intake: energy, protein, fiber, vit A, B1, B2, B6, B12, niacin, folate, C, iron, zinc, calcium, magnesium, phosphorus                                   | foods & supplements              | 24h recall                   |
|                     |           |                                  | meat-eaters      | 1711         | 44.8         | mean         | 0.4           | SD           |                                                                                                                                                         |                                  |                              |
| Beezhold 2010       | USA       | adults (Adventists)              | vegetarians      | 60           | 45.07        | mean         | 1.42          | SD           | intake: total n-3 FA, ALA, EPA, DHA                                                                                                                     | foods only                       | FFQ                          |
|                     |           |                                  | meat-eaters      | 78           | 41.00        | mean         | 1.4           | SD           |                                                                                                                                                         |                                  |                              |
| Bhatti 2007         | India     | adults                           | vegetarians      | 136          | 32.9         | mean         | 11.3          | SD           | status: iron                                                                                                                                            | users & non-users of supplements | n.a.                         |
|                     |           |                                  | meat-eaters      | 150          | 33.8         | mean         | 11.3          | SD           |                                                                                                                                                         |                                  |                              |
| Bissoli 2002        | Italy     | general population               | vegetarians      | 14           | 48.5         | mean         | 14.5          | SD           | intake: energy, protein, fiber, vit B6, folate                                                                                                          | foods only                       | not reported                 |
|                     |           |                                  | vegans           | 31           | 45.8         | mean         | 15.8          | SD           | status: folate, vit B12                                                                                                                                 | non-users of supplements         |                              |
|                     |           |                                  | meat-eaters      | 29           | 43.4         | mean         | 16.7          | SD           |                                                                                                                                                         |                                  |                              |
| Boanca 2014         | Romania   | adults                           | vegetarians      | 48           | 28.4         | mean         | 8.6           | SD           | status: vit B12                                                                                                                                         | non-users of supplements         | n.a.                         |
|                     |           |                                  | meat-eaters      | 38           | 29.8         | mean         | 10.1          | SD           |                                                                                                                                                         |                                  |                              |
| Brantsaerter 2018   | Norway    | adults                           | vegetarians      | 25           | 37.2         | mean         | 15.7          | SD           | intake: iodine                                                                                                                                          | foods & supplements              | 24h recall (twice)           |
|                     |           |                                  | vegans           | 19           | 30.1         | mean         | 7.1           | SD           | status: iodine                                                                                                                                          | users & non-users of supplements |                              |
|                     |           |                                  | meat-eaters      | 71           | 42.1         | mean         | 11.4          | SD           |                                                                                                                                                         |                                  |                              |
| Burns-Whitmore 2010 | USA       | adults                           | vegetarians      | 20           | 38           | mean         | 3             | SD           | status: PUFA, total n-3 FA, ALA, EPA, DHA                                                                                                               | non-users of supplements         | n.a.                         |
| Burns-Whitmore 2014 | USA       | adults                           | vegetarians      | 20           | 38           | mean         | 3             | SD           | status: PUFA, total n-3 FA, ALA, EPA, DHA                                                                                                               | non-users of supplements         | n.a.                         |
| Cade 2004           | UK        | women                            | vegetarians      | 10634        | 49           | mean         | 9             | SD           | intake: energy, protein, fiber, PUFA, vit A, folate, C, iron, zinc, calcium                                                                             | foods only                       | FFQ                          |
|                     |           |                                  | meat-eaters      | 24738        | 54           | mean         | 9             | SD           |                                                                                                                                                         |                                  |                              |
| Carmel 2002         | USA       | adults (Asian Indian immigrants) | vegetarians      | 8            | 29.9         | mean         | 20-69         | range        | status: folate, vit B12, D                                                                                                                              | users & non-users of supplements | n.a.                         |
| Chan 2009           | USA       | adults                           | vegetarians      | 150          | 61.6         | mean         | 13.3          | SD           | intake: vit D                                                                                                                                           | foods & supplements              | FFQ                          |
|                     |           |                                  | semi-vegetarians | 66           | 61.3         | mean         | 13.3          | SD           | status: vit D                                                                                                                                           | users & non-users of supplements |                              |
|                     |           |                                  | meat-eaters      | 212          | 60.2         | mean         | 13.3          | SD           |                                                                                                                                                         |                                  |                              |
| Chang 2019          | Taiwan    | adults                           | vegetarians      | 1403         | 54.0         | mean         | 9.3           | SD           | intake: energy, protein                                                                                                                                 | foods & supplements              | FFQ                          |

|                    |             |                     |                   |       |                   |              |                 |              |                                                                                                                    |                                  |                         |
|--------------------|-------------|---------------------|-------------------|-------|-------------------|--------------|-----------------|--------------|--------------------------------------------------------------------------------------------------------------------|----------------------------------|-------------------------|
|                    |             |                     | meat-eaters       | 3436  | 51.8              | mean         | 10.5            | SD           |                                                                                                                    |                                  |                         |
| Chiu 2014          | Taiwan      | adults              | vegetarians       | 1484  | 55.1              | mean         | 7.5             | SD           | intake: energy, protein, fiber, PUFA, vit B1, B2, B6, B12, niacin, folate, C, iron, zinc, calcium, magnesium       | foods only                       | FFQ                     |
|                    |             |                     | meat-eaters       | 2900  | 53.9              | mean         | 7.9             | SD           |                                                                                                                    |                                  |                         |
| Clarys 2013        | Belgium     | adults              | vegetarians       | 69    | 35 (m) 39 (w)     | mean         | 12 (m) 14 (w)   | SD           | intake: energy, protein, PUFA                                                                                      | foods only                       | 3-d food diary          |
|                    |             |                     | meat-eaters       | 69    | 36 (m) 40 (w)     | mean         | 12 (m) 14 (w)   | SD           |                                                                                                                    |                                  |                         |
| Clarys 2014        | Belgium     | adults              | vegans            | 104   | not reported      | not reported | 20-69           | range        | intake: energy, protein, PUFA, iron, calcium                                                                       | foods only                       | 52-item qualitative FFQ |
|                    |             |                     | vegetarians       | 573   | not reported      | not reported | 20-69           | range        |                                                                                                                    |                                  |                         |
|                    |             |                     | semi-vegetarians  | 498   | not reported      | not reported | 20-69           | range        |                                                                                                                    |                                  |                         |
|                    |             |                     | pesco-vegetarians | 145   | not reported      | not reported | 20-69           | range        |                                                                                                                    |                                  |                         |
|                    |             |                     | meat-eaters       | 155   | not reported      | not reported | 20-69           | range        |                                                                                                                    |                                  |                         |
| Crowe 2011         | UK          | adults              | vegetarians       | 417   | 44.0              | mean         | 14              | SD           | intake: energy, protein, vit D, calcium                                                                            | foods & supplements              | FFQ                     |
|                    |             |                     | vegans            | 87    | 48.0              | mean         | 13              | SD           |                                                                                                                    |                                  |                         |
|                    |             |                     | pesco-vegetarians | 208   | 51.0              | mean         | 12              | SD           | status: vit D                                                                                                      | users & non-users of supplements |                         |
|                    |             |                     | meat-eaters       | 1359  | 55.0              | mean         | 10              | SD           |                                                                                                                    |                                  |                         |
| Damayanti 2018     | USA         | adults (Adventists) | vegetarians       | 207   | not reported      | not reported | 29-94y          | range        | intake: vit B12                                                                                                    | foods & supplements              | 24h recall (6 times)    |
|                    |             |                     | vegans            | 67    | not reported      | not reported | 29-94y          | range        |                                                                                                                    |                                  |                         |
|                    |             |                     | pesco-vegetarians | 78    | not reported      | not reported | 29-94y          | range        | status: vit B12                                                                                                    | users & non-users of supplements |                         |
|                    |             |                     | semi-vegetarians  | 35    | not reported      | not reported | 29-94y          | range        |                                                                                                                    |                                  |                         |
|                    |             |                     | meat-eaters       | 341   | not reported      | not reported | 29-94y          | range        |                                                                                                                    |                                  |                         |
| Davey 2003         | UK          | adults              | vegetarians       | 17860 | 35.9              | mean         | 20-97           | range        | intake: energy, protein, fiber, PUFA, vit B1, B2, B6, B12, niacin, folate, C, D, E, iron, zinc, calcium, magnesium | foods only                       | FFQ                     |
|                    |             |                     | vegans            | 2396  | 33.1              | mean         | 20-97           | range        |                                                                                                                    |                                  |                         |
|                    |             |                     | pesco-vegetarians | 9423  | 39.5              | mean         | 20-97           | range        |                                                                                                                    |                                  |                         |
|                    |             |                     | meat-eaters       | 32308 | 48.7              | mean         | 20-97           | range        |                                                                                                                    |                                  |                         |
| de Bortoli 2009    | Brazil      | adults              | vegetarians       | 30    | 27                | mean         | not reported    | not reported | status: zinc                                                                                                       | non-users of supplements         | n.a.                    |
| Deriemaeker 2010 a | Belgium     | adults              | vegetarians       | 30    | 23                | mean         | 2               | SD           | intake: energy, protein, calcium, magnesium, phosphorus                                                            | foods only                       | 3-day food record       |
|                    |             |                     | meat-eaters       | 30    | 24                | mean         | 3               | SD           |                                                                                                                    |                                  |                         |
| Deriemaeker 2010 b | Belgium     | adults              | vegetarians       | 106   | 36                | mean         | 20-85           | range        | intake: energy, protein, fiber, PUFA, vit C, iron, zinc, calcium, magnesium, phosphorus                            | foods only                       | 3d food record          |
|                    |             |                     | meat-eaters       | 106   | 37                | mean         | 20-85           | range        |                                                                                                                    |                                  |                         |
| Deriemaeker 2011   | Netherlands | adults              | vegetarians       | 29    | 84.1 (f) 80.5 (m) | mean         | 5.1 (f) 7.5 (m) | SD           | intake: energy, protein, fiber, PUFA, vit A, B1, B2, C, D, iron, zinc, calcium, magnesium, phosphorus              | foods only                       | FFQ                     |
|                    |             |                     | meat-eaters       | 30    | 84.3 (f) 80.6 (m) | mean         | 5.0 (f) 7.3 (m) | SD           |                                                                                                                    |                                  |                         |
| Dyett 2013& 2014   | USA         | adults              | vegans            | 100   | 25-75             | range        | n.a.            | n.a.         | intake: vit B12, D, iron, zinc, calcium                                                                            | foods only                       | FFQ                     |
|                    |             |                     |                   |       |                   |              |                 |              |                                                                                                                    |                                  |                         |
| Elorinne 2016      | Finland     | adults              | vegans            | 22    | 33                | mean         | 24-50           | range        | intake: energy, protein, fiber, PUFA, vit A, B1, B2, B6, B12, niacin, folate, C, D, E, iron, zinc, calcium         | foods only                       | 3-d food record         |
|                    |             |                     | meat-eaters       | 19    | 35                | mean         | 24-52           | range        |                                                                                                                    |                                  |                         |
| Farmer 2011        | USA         | adults              | vegetarians       | 851   | ≥19               | range        | n.a.            | n.a.         | intake: energy, protein, fiber, vit A, B1, B2, B6, B12, niacin, folate, C, E, iron, zinc, calcium, magnesium       | foods only                       | 24h recall              |
|                    |             |                     | meat-eaters       | 12441 | ≥19               | range        | n.a.            | n.a.         |                                                                                                                    |                                  |                         |
| Fayet 2014         | Australia   | young women         | vegetarians       | 23    | 22.6              | mean         | 3.9             | SD           | intake: energy, protein, total n-3 FA, vit B12, iron, zinc                                                         | foods only                       | FFQ                     |
|                    |             |                     | meat-eaters       | 200   | 22.6              | mean         | 3.9             | SD           |                                                                                                                    |                                  |                         |
| Fokkema 2000a      | Netherlands | adults              | vegans            | 12    | 38.0              | mean         | 12.5            | SD           | intake: PUFA                                                                                                       | foods only                       | FFQ                     |
|                    |             |                     | meat-eaters       | 15    | 35.2              | mean         | 8.9             | SD           |                                                                                                                    |                                  |                         |
|                    |             |                     |                   |       |                   |              |                 |              | status: PUFA, total n-3 FA, ALA, EPA, DHA                                                                          | users & non-users of supplements |                         |

|                           |                |                                     |                      |       |              |              |              |                        |                                                                                                                        |                                  |                                                |
|---------------------------|----------------|-------------------------------------|----------------------|-------|--------------|--------------|--------------|------------------------|------------------------------------------------------------------------------------------------------------------------|----------------------------------|------------------------------------------------|
| Fokkema 2000b             | Netherlands    | adults                              | vegans               | 12    | 41           | mean         | 12.0         | SD                     | intake: PUFA, ALA                                                                                                      | foods only                       | FFQ                                            |
| Fokkema 2005              | Netherlands    | adults                              | vegetarians          | 20    | 40.2         | mean         | 14.0         | SD                     | status: ALA, EPA, DHA                                                                                                  | users & non-users of supplements | n.a.                                           |
| Gallego-Narbón 2018       | Spain          | adults                              | vegetarians          | 49    | 31.2         | mean         | 8.3          | SD                     | status: vit B12                                                                                                        | users & non-users of supplements | n.a.                                           |
|                           |                |                                     | vegans               | 54    | 29.5         | mean         | 7.1          | SD                     |                                                                                                                        |                                  |                                                |
| Gallego-Narbón 2019 a & b | Spain          | adults                              | vegetarians          | 49    | 31.3         | mean         | 8.6          | SD                     | status: folate, vit B12, iron                                                                                          | users & non-users of supplements | n.a.                                           |
|                           |                |                                     | vegans               | 55    | 29.5         | mean         | 7.1          | SD                     |                                                                                                                        |                                  |                                                |
| Gammon 2012               | New Zealand    | overweight women (Asian immigrants) | vegetarians          | 34    | 36.6         | mean         | 10.1         | SD                     | status: folate, vit B12                                                                                                | non-users of supplements         | n.a.                                           |
|                           |                |                                     | meat-eaters          | 90    | 40.3         | mean         | 9.08         | SD                     |                                                                                                                        |                                  |                                                |
| Geisel 2005               | Germany        | adults                              | vegetarians          | 48    | 53           | median       | 21, 75       | 25th, 75th percentiles | status: vit B6, folate, vit B12                                                                                        | users & non-users of supplements | n.a.                                           |
|                           |                |                                     | vegans               | 23    | 51           | median       | 28, 76       | 25th, 75th percentiles |                                                                                                                        |                                  |                                                |
|                           |                |                                     | meat-eaters          | 79    | 51           | median       | 23, 68       | 25th, 75th percentiles |                                                                                                                        |                                  |                                                |
| Geppert 2005              | Germany        | adults                              | vegetarians          | 114   | not reported | not reported | 18-43        | range                  | intake: energy, protein, fiber, EPA, DHA                                                                               | foods only                       | 3d food record                                 |
|                           |                |                                     |                      |       |              |              |              |                        | status: ALA, EPA, DHA                                                                                                  | non-users of supplements         |                                                |
| Geppert 2006              | Germany        | adults                              | vegetarians          | 106   | 25.9         | mean         | 5.6          | SD                     | status: vit E, EPA, DHA                                                                                                | non-users of supplements         | n.a.                                           |
| Gilsing 2010              | UK             | men (all)                           | vegetarians          | 231   | 46.2         | mean         | 11.7         | SD                     | intake: energy, protein, vit B12, folate                                                                               | foods & supplements              | FFQ                                            |
|                           |                |                                     | vegans               | 232   | 42.8         | mean         | 13.1         | SD                     | status: folate, vit B12                                                                                                | users & non-users of supplements |                                                |
|                           |                |                                     | meat-eaters          | 226   | 52.8         | mean         | 10.7         | SD                     |                                                                                                                        |                                  |                                                |
|                           |                | men (non-supplement users only)     | vegetarians          | 186   | not reported | not reported | not reported | not reported           | intake: energy, protein, vit B12, folate                                                                               | foods only                       | FFQ                                            |
|                           |                |                                     | vegans               | 189   | not reported | not reported | not reported | not reported           |                                                                                                                        |                                  |                                                |
|                           |                |                                     | meat-eaters          | 216   | not reported | not reported | not reported | not reported           |                                                                                                                        |                                  |                                                |
| Goff 2005                 | UK             | adults                              | vegans               | 21    | 35           | median       | 23-69        | range                  | intake: energy, protein, fiber, PUFA                                                                                   | foods only                       | 7d food record                                 |
|                           |                |                                     | meat-eaters          | 25    | 36           | median       | 24-75        | range                  |                                                                                                                        |                                  |                                                |
| Gojda 2013                | Czech republic | adults                              | vegans               | 11    | 29.47        | median       | 25.8-36.8    | range                  | intake: energy, protein                                                                                                | foods only                       | 3d food record                                 |
|                           |                |                                     | meat-eaters          | 10    | 27.23        | median       | 25.6-28.9    | range                  | status: PUFA, ALA, DHA                                                                                                 | users & non-users of supplements |                                                |
| Gómez-Donoso 2019         | Spain          | adults                              | high meat-eaters     | 2939  | 35           | mean         | 11           | SD                     | intake: energy, protein, fiber, PUFA, folate, vit C, D, calcium, magnesium                                             | foods only                       | FFQ                                            |
|                           |                |                                     | moderate meat-eaters | 1781  | 35           | mean         | 11           | SD                     |                                                                                                                        |                                  |                                                |
|                           |                |                                     | low meat-eaters      | 2245  | 35           | mean         | 11           | SD                     |                                                                                                                        |                                  |                                                |
| Gupta 2004                | Canada         | adults                              | vegetarians          | 172   | not reported | not reported | 18 - 84      | range                  | status: vit B12                                                                                                        | users & non-users of supplements | n.a.                                           |
|                           |                |                                     | meat-eaters          | 23    | not reported | not reported | 19 - 84      | range                  |                                                                                                                        |                                  |                                                |
| Haddad 2003               | USA            | general population                  | vegetarians          | 120   | not reported | not reported | 6-70+        | range                  | intake: protein, fiber, PUFA, vit A, B1, B2, B6, B12, niacin, folate, C, E, iron, zinc, calcium, magnesium, phosphorus | foods only                       | 24h recall (twice)                             |
|                           |                |                                     | meat-eaters          | 12543 | not reported | not reported | 6-70+        | range                  |                                                                                                                        |                                  |                                                |
| Hansen 2018               | Denmark        | adults                              | vegans               | 78    | 31           | mean         | 8            | SD                     | intake: energy, calcium                                                                                                | foods only                       | 4d weighed food record                         |
|                           |                |                                     | meat-eaters          | 77    | 32           | mean         | 8            | SD                     | status: vit D, calcium, bone markers, magnesium                                                                        | non-users of supplements         |                                                |
| Haroon 2012               | India          | adults                              | vegetarians          | 116   | 26           | mean         | 5.0          | SD                     | intake: vit B12                                                                                                        | foods only                       | FFQ                                            |
|                           |                |                                     | meat-eaters          | 35    | 26           | mean         | 5.0          | SD                     | status: folate, vit B12                                                                                                | non-users of supplements         |                                                |
| Harvey 2005               | UK             | women                               | vegetarians          | 30    | 31           | mean         | 6.0          | SD                     | intake: iron                                                                                                           | foods only                       | 7-d dupliate diet collection & 7-d food record |
|                           |                |                                     | meat-eaters          | 60    | 33           | mean         | 6.5          | SD                     | status: iron                                                                                                           | non-users of supplements         |                                                |
| Hawk 2012                 | USA            | female university students          | vegetarians          | 19    | 19.7         | mean         | 1.6          | SD                     | intake: energy, protein, fiber, PUFA, vit C, iron, calcium, phosphorus                                                 | foods only                       | 3d food record                                 |
|                           |                |                                     | meat-eaters          | 20    | 20.7         | mean         | 1.0          | SD                     | status: iron                                                                                                           | non-users of supplements         |                                                |
| He 2016                   | China          | adults                              | low animal protein   | 580   | 37.8         | mean         | 8.4          | SD                     | intake: energy, protein, fiber, vit A, C, iron, zinc, calcium, magnesium                                               | foods only                       | 24h recall (three times)                       |

|                     |                 |                               |                  | moderate animal protein | 580          | 37.6         | mean         | 8.6                    | SD                                                                                                                    | status: iron                     | users & non-users of supplements   |  |
|---------------------|-----------------|-------------------------------|------------------|-------------------------|--------------|--------------|--------------|------------------------|-----------------------------------------------------------------------------------------------------------------------|----------------------------------|------------------------------------|--|
|                     |                 |                               |                  | high animal protein     | 581          | 36.1         | mean         | 9.2                    | SD                                                                                                                    |                                  |                                    |  |
| Henjum 2018         | Norway          | women                         | vegetarians      | 36                      | 22           | median       | 21, 24       | 25th, 75th percentiles | status: iodine                                                                                                        | users & non-users of supplements | n.a.                               |  |
|                     |                 |                               | meat-eaters      | 367                     | 22           | median       | 21, 24       | 25th, 75th percentiles |                                                                                                                       |                                  |                                    |  |
| Herrmann 2001       | Germany         | adults                        | vegetarians      | 34                      | 22           | median       | 19.5, 49.3   | 5th, 95th percentiles  | status: folate, vit B12                                                                                               | non-users of supplements         | n.a.                               |  |
|                     |                 |                               | vegans           | 7                       | 22           | median       | 19, 30       | 5th, 95th percentiles  |                                                                                                                       |                                  |                                    |  |
|                     |                 |                               | meat-eaters      | 63                      | 23           | median       | not reported | not reported           |                                                                                                                       |                                  |                                    |  |
| Herrmann 2003a      | Gemany & NL     | adults                        | vegetarians      | 66                      | 48           | median       | 24, 75       | 5th, 95th percentiles  | status: vit B6, folate, vit B12                                                                                       | users & non-users of supplements | n.a.                               |  |
|                     |                 |                               | vegans           | 29                      | 37           | median       | 15, 64       | 5th, 95th percentiles  |                                                                                                                       |                                  |                                    |  |
|                     |                 |                               | meat-eaters      | 79                      | 51           | median       | 23, 68       | 5th, 95th percentiles  |                                                                                                                       |                                  |                                    |  |
| Herrmann 2003b      | Gemany & NL     | adults                        | vegtarians       | 111                     | 46           | mean         | 15           | SD                     | status: folate, vit B12                                                                                               | users & non-users of supplements | n.a.                               |  |
|                     |                 |                               | meat-eaters      | 93                      | 40           | mean         | 17           | SD                     |                                                                                                                       |                                  |                                    |  |
| Herrmann 2005       | Germany         | adults                        | vegetarians      | 114                     | 50           | median       | 35, 71       | 10th, 90th percentiles | status: vit B6, folate, vit B12                                                                                       | users & non-users of supplements | n.a.                               |  |
|                     |                 |                               | vegans           | 50                      | 44           | median       | 20, 66       | 10th, 90th percentiles |                                                                                                                       |                                  |                                    |  |
|                     |                 |                               | meat-eaters      | 109                     | 41           | median       | 24, 61       | 10th, 90th percentiles |                                                                                                                       |                                  |                                    |  |
| Herrmann 2009       | Germany         | men                           | vegetarians      | 54                      | 50           | mean         | 38–70 y      | range                  | status: folate, vit B12, D                                                                                            | non-users of supplements         | n.a.                               |  |
|                     |                 |                               | vegans           | 23                      | 45           | mean         | 31–74 y      | range                  |                                                                                                                       |                                  |                                    |  |
|                     |                 |                               | meat-eaters      | 35                      | 41           | mean         | 30–60        | range                  |                                                                                                                       |                                  |                                    |  |
|                     | Oman            | men (Asian-Indian immigrants) | vegetarians      | 19                      | 45           | mean         | 40–54        | range                  | status: folate, vit B12, D, bone markers                                                                              | non-users of supplements         | n.a.                               |  |
|                     |                 |                               | meat-eaters      | 54                      | 43           | mean         | 40–52        | range                  |                                                                                                                       |                                  |                                    |  |
| Ho-Pham 2009 & 2012 | Vietnam         | elderly women                 | vegetarians      | 105                     | 62           | mean         | 10           | SD                     | intake: energy, protein, calcium, phosphorus                                                                          | foods only                       | 2d food record                     |  |
|                     |                 |                               | meat-eaters      | 105                     | 62           | mean         | 10           | SD                     | status: vit D, calcium, bone markers                                                                                  | users & non-users of supplements |                                    |  |
| Hua 2001            | USA             | adults                        | vegetarians      | 29                      | 41           | mean         | 37-45        | 95% CI                 | status: iron                                                                                                          | non-users of supplements         | n.a.                               |  |
|                     |                 |                               | meat-eaters      | 29                      | 40           | mean         | 36-44        | 95% CI                 |                                                                                                                       |                                  |                                    |  |
| Huang 2003          | Taiwan          | young adults                  | vegetarians      | 37                      | 28.9         | mean         | 5.5          | SD                     | intake: energy, protein, fiber, vit B6, B12                                                                           | foods only                       | 3d food record                     |  |
|                     |                 |                               | meat-eaters      | 32                      | 22.9         | mean         | 1.6          | SD                     | status: vit A, B6, folate, B12                                                                                        | non-users of supplements         |                                    |  |
| Huang 2011          | Taiwan          | older adults                  | vegetarians      | 41                      | 71.2         | median       | 67, 75       | 25th, 75th percentiles | intake: energy, protein, fiber, vit B6, B12, calcium, magnesium                                                       | foods only                       | 24-h recall                        |  |
|                     |                 |                               | meat-eaters      | 1030                    | 71.0         | median       | 68, 75       | 25th, 75th percentiles |                                                                                                                       |                                  |                                    |  |
| Huang 2013          | China           | men                           | semi-vegetarians | 103                     | 40           | mean         | 10           | SD                     | status: folate, vit B12, PUFA, total n-3 FA, ALA, EPA, DHA                                                            | users & non-users of supplements | n.a.                               |  |
|                     |                 |                               | meat-eaters      | 128                     | 44           | mean         | 8            | SD                     |                                                                                                                       |                                  |                                    |  |
| Hung 2002           | Taiwan          | women (Buddhists)             | vegetarians      | 45                      | not reported | not reported | 31-45        | range                  | intake: energy, protein, B1, B2, B6, B12, niacin, folate                                                              | foods only                       | 24-h recall & semiquantitative FFQ |  |
|                     |                 |                               | meat-eaters      | 45                      | not reported | not reported | 31-45        | range                  | status: vit B6                                                                                                        | non-users of supplements         |                                    |  |
| Jin 2018            | USA             | adults                        | vegetarians      | 335                     | 55.6         | mean         | 9.2          | SD                     | intake: energy, protein, fiber, PUFA, total n-3 FA, vit A, B1, B2, B6, B12, niacin, folate, C, E, iron, zinc, calcium | foods only                       | FFQ                                |  |
|                     |                 |                               | meat-eaters      | 557                     | 55.2         | mean         | 9.5          | SD                     |                                                                                                                       |                                  |                                    |  |
| Kajanachumpol 2011  | Thailand        | adults                        | vegans           | 109                     | not reported | not reported | 30-50        | range                  | status: iron                                                                                                          | non-users of supplements         | n.a.                               |  |
|                     |                 |                               | meat-eaters      | 86                      | not reported | not reported | 30-50        | range                  |                                                                                                                       |                                  |                                    |  |
| Karabudak 2008      | Turkey          | young women                   | vegetarians      | 26                      | 29           | mean         | 8.84         | SD                     | intake: energy, protein, fiber, PUFA, vit A, B1, B2, B6, B12, niacin, folate, C, E, calcium,                          | foods only                       | 4d food record (twice)             |  |
|                     |                 |                               | meat-eaters      | 26                      | 27.4         | mean         | 6.58         | SD                     | status: folate, vit B12, C, E                                                                                         | non-users of supplements         |                                    |  |
| Kazimirova 2006     | Slovak Republic | adults                        | vegetarians      | 24                      | 40           | mean         | 1.7          | SD                     | status: folate, vit B12                                                                                               | users & non-users of supplements | n.a.                               |  |
|                     |                 |                               | meat-eaters      | 24                      | 41.2         | mean         | 2            | SD                     |                                                                                                                       |                                  |                                    |  |

|                               |             |                        |                  |      |              |              |              |              |                                                                                                                                        |                                  |                          |
|-------------------------------|-------------|------------------------|------------------|------|--------------|--------------|--------------|--------------|----------------------------------------------------------------------------------------------------------------------------------------|----------------------------------|--------------------------|
| Kim 2007                      | South Korea | postmenopausal women   | vegetarians      | 76   | 60.7         | mean         | 6.9          | SD           | intake: energy, protein, fiber, iron, zinc, calcium, magnesium, phosphorus                                                             | foods only                       | 24h recall (3 times)     |
|                               |             |                        | meat-eaters      | 76   | 60.8         | mean         | 6.7          | SD           | status: iron, zinc, calcium, BMD, magnesium, phosphorus                                                                                | non-users of supplements         |                          |
| Kim 2012                      | South Korea | postmenopausal women   | vegetarians      | 59   | 63           | mean         | 9.3          | SD           | intake: energy, protein, fiber, iron                                                                                                   | foods only                       | 24h recall (3 times)     |
|                               |             |                        | meat-eaters      | 48   | 62           | mean         | 8.3          | SD           | status: iron                                                                                                                           | non-users of supplements         |                          |
| Kapoor 2017                   | Pakistan    | adults                 | vegetarians      | 100  | 27.7         | mean         | 5.85         | SD           | status: folate, vit B12                                                                                                                | non-users of supplements         | n.a.                     |
|                               |             |                        | meat-eaters      | 100  | 28.8         | mean         | 5.7          | SD           |                                                                                                                                        |                                  |                          |
| Kniskern 2011                 | USA         | women                  | vegetarians      | 22   | 26.2         | mean         | 1.4          | SD           | intake: energy, protein, fiber                                                                                                         | foods only                       | 4-d food record          |
| Knurick 2015 & Johnston 2018  | USA         | adults                 | meat-eaters      | 27   | 27.2         | mean         | 6.7          | SD           | intake: energy, protein, fiber, total n-3 FA, vit A, B6, B12, folate, C, E, iron, zinc, calcium, magnesium                             | foods only                       | FFQ and 24h recall       |
|                               |             |                        | vegetarians      | 26   | 31.1         | mean         | 9.1          | SD           |                                                                                                                                        | users & non-users of supplements |                          |
|                               |             |                        | vegans           | 28   | 33.9         | mean         | 8.6          | SD           | status: vit C, BMD                                                                                                                     |                                  |                          |
| Kornsteiner 2008              | Austria     | adults                 | vegetarians      | 25   | 36.4         | mean         | 15.2         | SD           | intake: PUFA, total n-3 FA, ALA, EPA, DHA                                                                                              | foods only                       | 24h recall, FFQ          |
|                               |             |                        | vegans           | 37   | 29.5         | mean         | 11.3         | SD           | status: BMD, PUFA, ALA                                                                                                                 | users & non-users of supplements |                          |
|                               |             |                        | semi-vegetarians | 13   | 31.8         | mean         | 12.5         | SD           |                                                                                                                                        |                                  |                          |
|                               |             |                        | meat-eaters      | 23   | 38.5         | mean         | 14.6         | SD           |                                                                                                                                        |                                  |                          |
| Kotova 2015                   | Sweden      | adults                 | vegetarians      | 29   | not reported | not reported | 21-37        | range        | status: folate, vit B12                                                                                                                | users & non-users of supplements | n.a.                     |
|                               |             |                        | meat-eaters      | 27   | not reported | not reported | 21-37        | range        |                                                                                                                                        |                                  |                          |
| Krajcovicova-Kudlackova 2000  | Slovakia    | adults                 | vegetarians      | 54   | 37.3         | mean         | 1.0          | SD           | intake: energy, PUFA, ALA, vit B12, folate, C, E                                                                                       | foods only                       | FFQ                      |
|                               |             |                        | vegans           | 32   | 41.5         | mean         | 1.8          | SD           | status: folate, vit B12, C, E                                                                                                          | users & non-users of supplements |                          |
|                               |             |                        | meat-eaters      | 59   | 40.9         | mean         | 0.7          | SD           |                                                                                                                                        |                                  |                          |
| Krajčovičová-Kudláčková 2003a | Slovakia    | adults                 | vegetarians      | 31   | 39.1         | mean         | 1.5          | SD           | status: iodine                                                                                                                         | users & non-users of supplements | n.a.                     |
|                               |             |                        | vegans           | 15   | 42.2         | mean         | 2.6          | SD           |                                                                                                                                        |                                  |                          |
|                               |             |                        | meat-eaters      | 35   | 43.4         | mean         | 1.4          | SD           |                                                                                                                                        |                                  |                          |
| Krajcovicova-Kudlackova 2003b | Slovakia    | adults                 | vegetarians      | 110  | 37.5         | mean         | 0.3          | SD           | status: folate, vit B12, C, iron, zinc                                                                                                 | non-users of supplements         | n.a.                     |
|                               |             |                        | meat-eaters      | 101  | 35           | mean         | 0.4          | SD           |                                                                                                                                        |                                  |                          |
| Krajcovicova-Kudlackova 2007  | Slovakia    | adults (normal weight) | vegetarians      | 52   | 25.2         | mean         | 0.4          | SD           | status: vit B6, folate, vit B12, C                                                                                                     | non-users of supplements         | n.a.                     |
|                               |             |                        | meat-eaters      | 52   | 23.9         | mean         | 0.3          | SD           |                                                                                                                                        |                                  |                          |
| Krajcovicová-Kudláčková 2011  | Slovakia    | older adults           | meat-eaters      | 38   | 63.4         | mean         | 0.5          | SD           | intake: fiber, ALA, vit B6, B12, folate, C                                                                                             | foods only                       | FFQ                      |
|                               |             |                        | vegetarians      | 45   | 65.2         | mean         | 0.5          | SD           | status: vit B6, folate, vit B12, C, E                                                                                                  | non-users of supplements         |                          |
| Krajcovicová-Kudláčková 2013  | Slovakia    | adults                 | meat-eaters      | 73   | not reported | not reported | 20-63        | range        | status: folate, vit B12                                                                                                                | non-users of supplements         | n.a.                     |
|                               |             |                        | vegetarians      | 54   | not reported | not reported | 20-64        | range        |                                                                                                                                        |                                  |                          |
| Kristensen 2015               | Denmark     | adults                 | vegans           | 70   | 28           | mean         | 25-34        | range        | intake: energy, protein, fiber, PUFA, vit A, B1, B2, B6, B12, niacin, folate, C, E, iron, zinc, calcium, iodine, magnesium, phosphorus | foods & supplements              | 4/7-d food record        |
|                               |             |                        | meat-eaters      | 1257 | 42           | mean         | 33-52        | range        |                                                                                                                                        |                                  |                          |
| Krivosikova 2010              | Slovakia    | women                  | vegetarians      | 141  | 41.9         | mean         | 19.7         | SD           | status: folate, vit B12, calcium, bonemarkers, phosphorus                                                                              | non-users of supplements         | n.a.                     |
|                               |             |                        | meat-eaters      | 131  | 40.8         | mean         | 19.8         | SD           |                                                                                                                                        |                                  |                          |
| Kuchta 2016                   | Poland      | adults                 | vegans           | 21   | 28           | mean         | 5            | SD           | intake: energy, protein, fiber, PUFA, vit A, B1, B6, C                                                                                 | foods only                       | 24h recall (three times) |
|                               |             |                        | meat-eaters      | 21   | 28           | mean         | 4            | SD           |                                                                                                                                        |                                  |                          |
| Kwok 2002                     | China       | older women            | vegetarians      | 119  | >55          | not reported | not reported | not reported | status: folate, vit B12, iron                                                                                                          | users & non-users of supplements | n.a.                     |
| Kwok 2004                     | China       | older women            | vegetarians      | 113  | 77.4         | mean         | 7.6          | SD           | status: folate, vit B12                                                                                                                | users & non-users of supplements | n.a.                     |
| Kwok 2012                     | China       | adults                 | vegetarians      | 50   | 45+9         | mean         | 9            | SD           | intake: energy, protein<br>status: folate, vit B12                                                                                     | foods only                       | FFQ                      |
| Leblanc 2000                  | France      | adults                 | vegetarians      | 94   | 51.70        | mean         | 16.5         | SD           | intake: energy, protein, vit B12, folate, C, iron,                                                                                     | foods only                       | 5d food record           |

|                   |             |                                          |             |     |                 |              |                              |                        |                                                                                                                       |                                  |                  |
|-------------------|-------------|------------------------------------------|-------------|-----|-----------------|--------------|------------------------------|------------------------|-----------------------------------------------------------------------------------------------------------------------|----------------------------------|------------------|
|                   |             | adults (Hindu)                           | vegetarians | 34  | 40.41           | mean         | 11                           | SD                     | calcium, magnesium                                                                                                    |                                  |                  |
| Lee 2000          | China       | adults                                   | vegetarians | 60  | not reported    | not reported | 25-55                        | range                  | intake: energy, protein                                                                                               | foods only                       | FFQ              |
|                   |             |                                          | meat-eaters | 194 | not reported    | not reported | 25-70                        | range                  | status: PUFA, total n-3 FA, ALA, EPA, DHA                                                                             | users & non-users of supplements |                  |
| Lee 2011          | Korea       | women (Bhuddist nuns)                    | vegetarians | 54  | not reported    | not reported | 21-44                        | range                  | intake: energy, PUFA, protein, folate, vit C                                                                          | foods only                       | 3d food record   |
|                   |             | women (Catholic nuns & college students) | meat-eaters | 81  | not reported    | not reported | 18-41                        | range                  | status: folate, vit B12, iron                                                                                         | non-users of supplements         |                  |
| Leonard 2014      | Australia   | young women                              | vegetarians | 31  | not reported    | not reported | 18-35                        | range                  | intake: iron                                                                                                          | foods only                       | FFQ              |
|                   |             |                                          | meat-eaters | 76  | not reported    | not reported | 18-35                        | range                  | status: iron                                                                                                          | non-users of supplements         |                  |
| Leung 2011        | USA         | adults                                   | vegetarians | 78  | 30.8            | mean         | 10.6                         | SD                     | status: folate, vit B12, iodine                                                                                       | users & non-users of supplements | n.a.             |
|                   |             |                                          | vegans      | 62  | 36.6            | mean         | 13.2                         | SD                     |                                                                                                                       |                                  |                  |
| Li 2000           | Australia   | men                                      | vegetarians | 43  | 34.9            | mean         | 9                            | SD                     | intake: protein, fiber, PUFA, vit A, C, iron, zinc, calcium                                                           | foods only                       | FFQ              |
|                   |             |                                          | vegans      | 18  | 33              | mean         | 7.7                          | SD                     | status: vit A, folate, vit B12, E, iron                                                                               | non-users of supplements         |                  |
|                   |             |                                          | meat-eaters | 78  | 37.4            | mean         | 8.4                          | SD                     |                                                                                                                       |                                  |                  |
| Lightowler 2000a  | UK          | adults                                   | vegans      | 26  | 40.1            | mean         | 16.6                         | SD                     | intake: energy, protein, fiber, PUFA, iron, zinc, calcium, magnesium                                                  | foods & supplements              | 4d food record   |
| Lightowler 2000b  | UK          | adults (all)                             | vegans      | 26  | 40.3            | mean         | 3.4                          | SD                     | intake: vit A, B1, B2, B6, B12, niacin, folate, C                                                                     | foods & supplements              | 4day food record |
|                   |             | adults (non-supplement users only)       | vegans      | 17  | 41              | mean         | 3.5                          | SD                     |                                                                                                                       | foods only                       | 4day food record |
| Lloyd-Wright 2003 | UK          | adults                                   | vegans      | 69  | not reported    | not reported | not reported                 | not reported           | status: DHA                                                                                                           | users & non-users of supplements | n.a.             |
| Lütjohann 2018    | Germany     | adults                                   | meat-eaters | 19  | 24.9            | mean         | 2                            | SD                     | intake: energy, protein                                                                                               | foods only                       | 7d food diary    |
|                   |             |                                          | vegetarians | 35  | 24.5            | mean         | 2.5                          | SD                     |                                                                                                                       |                                  |                  |
|                   |             |                                          | vegans      | 19  | 27.0            | mean         | 5.5                          | SD                     |                                                                                                                       |                                  |                  |
| Madry 2012        | Poland      | adults                                   | vegans      | 20  | 22.95           | mean         | 0.2                          | SD                     | status: vit B12                                                                                                       | non-users of supplements         | n.a.             |
|                   |             |                                          | vegans      | 10  | 23.00           | mean         | 0.2                          | SD                     |                                                                                                                       |                                  |                  |
|                   |             |                                          | vegans      | 10  | 22.9            | mean         | 0.2                          | SD                     |                                                                                                                       |                                  |                  |
| Majchrzak 2006    | Austria     | adults                                   | vegetarians | 36  | 34.2            | mean         | 13.6                         | SD                     | intake: B1, B2, B6, B12, folate                                                                                       | foods only                       | 24h recall       |
|                   |             |                                          | vegans      | 42  | 30.7            | mean         | 9.9                          | SD                     | status: vit B1, B2, B6, folate, B12                                                                                   | users & non-users of supplements |                  |
|                   |             |                                          | meat-eaters | 40  | 38.48           | mean         | 14.8                         | SD                     |                                                                                                                       |                                  |                  |
| Manjari 2001      | India       | adults                                   | vegetarians | 30  | 31.2            | mean         | 1.1                          | SD                     | status: ALA, EPA, DHA                                                                                                 | users & non-users of supplements | n.a.             |
|                   |             |                                          | meat-eaters | 44  | 31.5            | mean         | 1.7                          | SD                     |                                                                                                                       |                                  |                  |
| Mann 2006         | Australia   | men                                      | vegetarians | 43  | 34.9            | mean         | 9                            | SD                     | intake: energy, protein, PUFA, total n-3 FA, ALA, EPA, DHA                                                            | foods only                       | FFQ              |
|                   |             |                                          | vegans      | 18  | 33              | mean         | 7.7                          | SD                     | status: PUFA, total n-3 FA, ALA, EPA, DHA                                                                             | non-users of supplements         |                  |
|                   |             |                                          | meat-eaters | 78  | 37.4            | mean         | 8.4                          | SD                     |                                                                                                                       |                                  |                  |
| Mearns 2017       | New Zealand | women (South Asian)                      | vegetarians | 33  | not reported    | not reported | 18-50                        | range                  | intake: vit B12                                                                                                       | foods only                       | FFQ              |
|                   |             |                                          | meat-eaters | 27  | not reported    | not reported | 18-50                        | range                  |                                                                                                                       |                                  |                  |
| Montalcini 2015   | Italy       | adults                                   | meat-eaters | 26  | 30.5            | mean         | 6.7                          | SD                     | intake: energy, protein                                                                                               | foods only                       | 7d food record   |
|                   |             |                                          | vegetarians | 26  | 32.6            | mean         | 8.4                          | SD                     |                                                                                                                       |                                  |                  |
| Morad 2005        | Israel      | adults                                   | vegetarians | 17  | not reported    | not reported | 19-60+                       | range                  | status: vit B12                                                                                                       | users & non-users of supplements | n.a.             |
| Naik 2013         | India       | young adults                             | vegetarians | 51  | 27.6            | median       | 26, 30                       | 25th, 75th percentiles | intake: energy, protein, vit B12, folate<br>status: folate, vit B12, iron                                             | foods only                       | 24h recall       |
| Naik 2018         | India       | adults                                   | vegetarians | 119 | 28.2 (f) 29 (m) | median       | 27, 32.5 (f)<br>25.5, 33 (m) | 25th, 75th percentiles | intake: energy, protein, vit B12, folate                                                                              | foods & supplements              | 24 h recall      |
|                   |             |                                          |             |     |                 |              |                              |                        | status: folate, vit B12                                                                                               | users & non-users of supplements |                  |
| Nakamoto 2008     | Japan       | men                                      | vegetarians | 20  | 45.2            | mean         | 8.3                          | SD                     | intake: energy, protein, fiber, vit A, B1, B2, B6, B12, niacin, folate, E, iron, zinc, calcium, magnesium, phosphorus | foods only                       | 3d food record   |
|                   |             |                                          | meat-eaters | 32  | 44.2            | mean         | 5.2                          | SD                     |                                                                                                                       |                                  |                  |

|                 |                       |             |                         |       |              |              |              |              |                                                                                                                                                                                                                    |                                                                               |                                           |
|-----------------|-----------------------|-------------|-------------------------|-------|--------------|--------------|--------------|--------------|--------------------------------------------------------------------------------------------------------------------------------------------------------------------------------------------------------------------|-------------------------------------------------------------------------------|-------------------------------------------|
| Nakamoto 2008a  | Japan                 | women       | vegetarians             | 55    | 45.9         | mean         | 8.8          | SD           | intake: energy, protein, fiber, vit A, B1, B2, B6, B12, niacin, folate, E, iron, zinc, calcium, magnesium, phosphorus                                                                                              | foods only                                                                    | 3d food record                            |
| Nebi 2019 a&b   | Germany               | adults      | meat-eaters             | 27    | 27.4         | mean         | 4.03         | SD           | intake: energy, protein, fiber, vit A, B1, B2, B6, B12, niacin, folate, E, iron, zinc, calcium, magnesium, phosphorus<br>status: folate, vit B12, D, iron, zinc, calcium, magnesium                                | foods only                                                                    | 24h recall                                |
|                 |                       |             | vegetarians             | 26    | 27.6         | mean         | 4.31         | SD           |                                                                                                                                                                                                                    | non-users of supplements                                                      |                                           |
|                 |                       |             | vegans                  | 28    | 27.5         | mean         | 4.24         | SD           |                                                                                                                                                                                                                    |                                                                               |                                           |
| Obeld 2002      | Germany & Netherlands | adults      | vegetarians             | 64    | not reported | not reported | not reported | not reported | status: folate, vit B12, iron                                                                                                                                                                                      | users & non-users of supplements                                              | n.a.                                      |
|                 |                       |             | vegans                  | 29    | not reported | not reported | not reported | not reported |                                                                                                                                                                                                                    |                                                                               |                                           |
|                 |                       |             | semi-vegetarians        | 20    | not reported | not reported | not reported | not reported |                                                                                                                                                                                                                    |                                                                               |                                           |
| Obeld 2017      | Germany               | adults      | vegetarians             | 67    | 49.4         | mean         | 13.3         | SD           | status: vit B12                                                                                                                                                                                                    | users & non-users of supplements                                              | n.a.                                      |
|                 |                       |             | vegans                  | 38    | 43.5         | mean         | 17.3         | SD           |                                                                                                                                                                                                                    |                                                                               |                                           |
| Outila 2000 a&b | Finland               | women       | vegetarians             | 6     | 33           | mean         | 9            | SD           | intake: calcium                                                                                                                                                                                                    | foods only                                                                    | FFQ (three times)                         |
|                 |                       |             | vegans                  | 6     | 33           | mean         | 7            | SD           | status: vit D, bone markers                                                                                                                                                                                        | non-users of supplements                                                      |                                           |
|                 |                       |             | meat-eaters             | 16    | 33           | mean         | 7            | SD           |                                                                                                                                                                                                                    |                                                                               |                                           |
| Pinto 2017      | UK                    | adults      | vegans                  | 23    | 49           | mean         | 7.9          | SD           | intake: energy, protein, PUFA, ALA, EPA                                                                                                                                                                            | foods only                                                                    | FFQ                                       |
|                 |                       |             | meat-eaters             | 24    | 54           | mean         | 9.1          | SD           | status: vit B12, D                                                                                                                                                                                                 | users & non-users of supplements (users of EPA/DHA supplements were excluded) |                                           |
| Raghunath 2006  | India                 | adults      | vegetarians             | 170   | not reported | not reported | 20-40        | range        | intake: iron, zinc, calcium, magnesium                                                                                                                                                                             | foods only                                                                    | 24 h collection of duplicate food portion |
|                 |                       |             | meat-eaters             | 80    | not reported | not reported | 20-40        | range        |                                                                                                                                                                                                                    |                                                                               |                                           |
| Rizzo 2013      | USA                   | adults      | meat-eaters             | 33634 | 59           | mean         | 30-112       | range        | intake: energy, protein, fiber, PUFA, total n-3 FA, DHA                                                                                                                                                            | foods & supplements                                                           | FFQ                                       |
|                 |                       |             | semi-vegetarians        | 4042  | 59           | mean         | 30-112       | range        |                                                                                                                                                                                                                    |                                                                               |                                           |
|                 |                       |             | pesco-vegetarians       | 6583  | 59           | mean         | 30-112       | range        |                                                                                                                                                                                                                    |                                                                               |                                           |
|                 |                       |             | vegetarians             | 21799 | 59           | mean         | 30-112       | range        |                                                                                                                                                                                                                    |                                                                               |                                           |
|                 |                       |             | vegans                  | 5694  | 59           | mean         | 30-112       | range        |                                                                                                                                                                                                                    |                                                                               |                                           |
| Rosell 2005     | UK                    | men         | vegetarians             | 231   | 46.2         | mean         | 12.1         | SD           | intake: energy, protein, fiber, PUFA                                                                                                                                                                               | foods only                                                                    | FFQ                                       |
|                 |                       |             | vegans                  | 232   | 42.8         | mean         | 13.1         | SD           | status: ALA, EPA, DHA                                                                                                                                                                                              | non-users of supplements                                                      |                                           |
|                 |                       |             | meat-eaters             | 196   | 52.2         | mean         | 10.8         | SD           |                                                                                                                                                                                                                    |                                                                               |                                           |
| Sanders 2009    | UK                    | men         | vegans                  | 57    | not reported | not reported | not reported | not reported | intake: ALA, EPA, DHA                                                                                                                                                                                              | foods only                                                                    | 7-d weight record                         |
|                 |                       |             | meat-eaters             | 138   | not reported | not reported | not reported | not reported |                                                                                                                                                                                                                    |                                                                               |                                           |
| Sanders 2014    | UK                    | men         | vegans                  | 159   | not reported | not reported | 20-70        | range        | status: ALA, EPA, DHA                                                                                                                                                                                              | users & non-users of supplements                                              | n.a.                                      |
|                 |                       |             | meat-eaters             | 164   | not reported | not reported | 20-70        | range        |                                                                                                                                                                                                                    |                                                                               |                                           |
| Salvador 2019   | Spain                 | adults      | vegetarians             | 49    | 30           | median       | 12           | IQR          | status: PUFA, total n-3 FA, ALA, EPA, DHA                                                                                                                                                                          | users & non-users of supplements                                              | FFQ                                       |
|                 |                       |             | vegans                  | 55    | 31           | median       | 12           | IQR          |                                                                                                                                                                                                                    |                                                                               |                                           |
| Sarter 2015     | USA                   | adults      | vegans                  | 166   | not reported | not reported | 20-90        | range        | status: ALA, EPA, DHA                                                                                                                                                                                              | non-users of supplements                                                      | 3d food record                            |
| Schwarz 2014    | Germany               | adults      | vegans                  | 10    | not reported | not reported | not reported | not reported | status: vit B12                                                                                                                                                                                                    | non-users of supplements                                                      | n.a.                                      |
| Schlesier 2012  | Germany               | adults      | vegetarians             | 14    | 24.5         | mean         | 19-33        | range        | status: iron                                                                                                                                                                                                       | non-users of supplements                                                      | n.a.                                      |
|                 |                       |             | meat-eaters             | 20    | 22.5         | mean         | 20-29        | range        |                                                                                                                                                                                                                    |                                                                               |                                           |
| Schüpbach 2017  | Switzerland           | adults      | vegetarians             | 53    | 30.8         | mean         | 7.6          | SD           | intake: energy, protein, fiber, PUFA, vit A, B1, B2, B6, B12, niacin, folate, E, iron, zinc, calcium, magnesium, phosphorus<br>status: vit A, B1, B2, B6, niacin, folate, B12, C, E, iron, zinc, iodine, magnesium | foods only                                                                    | 3d weighted food record                   |
|                 |                       |             | vegans                  | 53    | 29.9         | mean         | 7.3          | SD           |                                                                                                                                                                                                                    | non-users of supplements                                                      |                                           |
|                 |                       |             | meat-eaters             | 100   | 31.6         | mean         | 9.4          | SD           |                                                                                                                                                                                                                    |                                                                               |                                           |
| Sellmeyer 2001  | USA                   | older women | low animal protein      | 207   | 74.3         | mean         | 5.4          | SD           | intake: energy, protein, calcium                                                                                                                                                                                   | foods & supplements                                                           | FFQ                                       |
|                 |                       |             | moderate animal protein | 207   | 73.2         | mean         | 4.9          | SD           |                                                                                                                                                                                                                    |                                                                               |                                           |
|                 |                       |             | high animal protein     | 207   | 72.5         | mean         | 4.5          | SD           |                                                                                                                                                                                                                    |                                                                               |                                           |

|                  |           |                                    |                   |       |              |              |            |                       |                                                                                                                                             |                                                                               |                   |
|------------------|-----------|------------------------------------|-------------------|-------|--------------|--------------|------------|-----------------------|---------------------------------------------------------------------------------------------------------------------------------------------|-------------------------------------------------------------------------------|-------------------|
| Shridhar 2014    | India     | adults                             | vegetarians       | 2148  | 41.2         | mean         | 10.2       | SD                    | intake: energy, protein, fiber, vit B12, folate, C, iron, zinc, calcium                                                                     | foods only                                                                    | FFQ               |
|                  |           |                                    | meat-eaters       | 4407  | 40.8         | mean         | 10.4       | SD                    |                                                                                                                                             |                                                                               |                   |
| Śliwińska 2018   | Poland    | adults                             | vegetarians       | 32    | 29.8         | mean         | 5.9        | SD                    | status: iron                                                                                                                                | users & non-users of supplements                                              | 24 h recall       |
|                  |           |                                    | vegans            | 23    | 32.7         | mean         | 8          | SD                    |                                                                                                                                             |                                                                               |                   |
|                  |           |                                    | meat-eaters       | 36    | 28.1         | mean         | 11.5       | SD                    |                                                                                                                                             |                                                                               |                   |
| Sobiecki 2016    | UK        | adults                             | meat-eaters       | 17244 | 63.3         | mean         | 11.7       | SD                    | intake: energy, protein, fiber, PUFA, vit A, B1, B2, B6, B12, niacin, folate, C, D, E, iron, zinc, calcium, magnesium                       | foods only                                                                    | FFQ               |
|                  |           |                                    | pesco-vegetarians | 4531  | 58.3         | mean         | 11.2       | SD                    |                                                                                                                                             |                                                                               |                   |
|                  |           |                                    | vegetarians       | 6673  | 56.1         | mean         | 11         | SD                    |                                                                                                                                             |                                                                               |                   |
|                  |           |                                    | vegans            | 803   | 54.2         | mean         | 11.1       | SD                    |                                                                                                                                             |                                                                               |                   |
| Somannavar 2012  | India     | adults                             | vegetarians       | 50    | 43.9         | mean         | 7.2        | SD                    | status: vit A, E                                                                                                                            | users & non-users of supplements                                              | n.a.              |
|                  |           |                                    | meat-eaters       | 50    | 46.38        | mean         | 6.34       | SD                    |                                                                                                                                             |                                                                               |                   |
| Su 2006          | Taiwan    | postmenopausal women               | vegetarians       | 57    | 59.2         | mean         | 6.4        | SD                    | status: vit B6, folate, B12                                                                                                                 | users & non-users of supplements                                              | n.a.              |
|                  |           |                                    | meat-eaters       | 61    | 57.7         | mean         | 5.1        | SD                    |                                                                                                                                             |                                                                               |                   |
| Su 2011          | Taiwan    | postmenopausal women               | vegetarians       | 49    | 58.6         | mean         | 6          | SD                    | status: vit B6, folate, B12                                                                                                                 | users & non-users of supplements (users of vit B12 supplements were excluded) | n.a.              |
|                  |           |                                    | meat-eaters       | 41    | 57.2         | mean         | 5.4        | SD                    |                                                                                                                                             |                                                                               |                   |
| Vinagre 2013     | Brazil    | adults                             | vegans            | 21    | 35           | mean         | 10         | SD                    | intake: energy, fiber, PUFA                                                                                                                 | foods only                                                                    | 3d food record    |
|                  |           |                                    | vegetarians       | 29    | 37           | mean         | 9          | SD                    |                                                                                                                                             |                                                                               |                   |
| Waldmann 2003    | Germany   | adults                             | vegans            | 98    | 42.4         | median       | 23.2, 74.3 | 5th, 95th percentiles | intake: energy, protein, fiber, PUFA, ALA, vit A, B1, B2, B6, B12, niacin, folate, C, E, iron, zinc, calcium, iodine, magnesium, phosphorus | foods only                                                                    | 9-day FFQ (twice) |
|                  |           |                                    | vegetarians       | 56    | 44.9         | median       | 25.8, 70.7 | 5th, 95th percentiles |                                                                                                                                             |                                                                               |                   |
| Waldmann 2004    | Germany   | adults                             | vegetarians       | 45    | 44.6         | mean         | 15         | SD                    | status: vit B6, folate, B12, iron                                                                                                           | users & non-users of supplements (users of vit B12 supplements were excluded) | 9d FFQ (twice)    |
|                  |           |                                    |                   | 86    | 43.8         | mean         | 15.6       | SD                    |                                                                                                                                             |                                                                               |                   |
| Waldmann 2005    | Germany   | adults                             | vegans            | 98    | 43.4         | mean         | 15.4       | SD                    | intake: PUFA, total n-3 FA                                                                                                                  | foods only                                                                    | FFQ (twice)       |
|                  |           |                                    |                   | 56    | 45.7         | mean         | 14.2       | SD                    |                                                                                                                                             |                                                                               |                   |
| Welch 2010       | UK        | adults (all)                       | vegetarians       | 250   | 57.1         | mean         | 6.8        | SD                    | intake: total n-3 FA, EPA, DHA                                                                                                              | foods & supplements                                                           | 7d food record    |
|                  |           |                                    | vegans            | 28    | 53.7         | mean         | 5.6        | SD                    |                                                                                                                                             |                                                                               |                   |
|                  |           |                                    | meat-eaters       | 14144 | 61.9         | mean         | 7.7        | SD                    |                                                                                                                                             |                                                                               |                   |
|                  |           | adults (non-supplement users only) | vegetarians       | 25    | 61.4         | mean         | 9.9        | SD                    | intake: total n-3 FA, EPA, DHA                                                                                                              | foods only                                                                    | 7d food record    |
|                  |           |                                    | vegans            | 5     | 54.4         | mean         | 11.8       | SD                    |                                                                                                                                             |                                                                               |                   |
|                  |           |                                    | meat-eaters       | 2616  | 64.5         | mean         | 7.96       | SD                    |                                                                                                                                             |                                                                               |                   |
| Wójciak 2004     | Poland    | young women                        | vegetarians       | 25    | not reported | not reported | 18-24      | range                 | status: iron, zinc, calcium, magnesium                                                                                                      | users & non-users of supplements                                              | 24h recall        |
|                  |           |                                    | meat-eaters       | 28    | not reported | not reported | 18-22      | range                 |                                                                                                                                             |                                                                               |                   |
| Wongprachum 2012 | Thailand  | adults & children                  | vegans            | 234   | not reported | not reported | 6-45       | range                 | status: iron                                                                                                                                | users & non-users of supplements                                              | n.a.              |
| Wu 2006          | Taiwan    | postmenopausal women               | vegetarians       | 25    | 52.5         | mean         | 4.8        | SD                    | status: vit E, EPA, DHA                                                                                                                     | users & non-users of supplements                                              | n.a.              |
| Xie 2019         | China     | adults                             | vegans            | 62    | 33.8         | mean         | 7.1        | SD                    | intake: energy, protein, vit B12, C, calcium, magnesium, phosphorus                                                                         | foods only                                                                    | 24h recall        |
|                  |           |                                    | vegetarians       | 184   | 32.3         | mean         | 6.3        | SD                    |                                                                                                                                             |                                                                               |                   |
|                  |           |                                    | meat-eaters       | 246   | 32.1         | mean         | 6.5        | SD                    |                                                                                                                                             |                                                                               |                   |
| Yen 2008 & 2010  | Taiwan    | adults                             | vegetarians       | 21    | 34.8         | mean         | 4.5        | SD                    | intake: energy, protein, B1, B2, B12, folate, C, E, iron, zinc, calcium                                                                     | foods & supplements                                                           | 3d food record    |
|                  |           |                                    | meat-eaters       | 28    | 35.9         | mean         | 4.1        | SD                    |                                                                                                                                             |                                                                               |                   |
| Yep 2002         | Australia | adults                             | vegetarians       | 10    | not reported | not reported | 21–64      | range                 | status: PUFA, total n-3 FA, ALA, EPA, DHA                                                                                                   | users & non-users of supplements                                              | n.a.              |
|                  |           |                                    | meat-eaters       | 6     | not reported | not reported | 21–64      | range                 |                                                                                                                                             |                                                                               |                   |

#### References

Al-Delaimy, W.K.; van Kappel, A.L.; Ferrari, P.; Slimani, N.; Steghens, J.-P.; Bingham, S.; Johansson, I.; Wallström, P.; Overvad, K.; Tjønneland, A., et al. Plasma levels of six carotenoids in nine European countries: report from the European Prospective Investigation into Cancer and Nutrition (EPIC). *Public health nutrition* **2004**, *7*, 713-722, doi:10.1079/phn2004598.



Allen, L.H. Causes of vitamin B12 and folate deficiency. *Food and Nutrition Bulletin* **2008**, *29*, 520-33.

Allès, B.; Baudry, J.; Méjean, C.; Touvier, M.; Péneau, C.; Hercberg, S.; Kesse-Guyot, E. Comparison of Sociodemographic and Nutritional Characteristics between Self-Reported Vegetarians, Vegans, and Meat-Eaters from the NutriNet-Santé Study. *Nutrients* **2017**, *9*, 1023, doi:10.3390/nu9091023.

Andrich, D.E.; Fillon, M.E.; Woods, M.J.; Dwyer, J.T.; Gorbach, S.L.; Goldin, B.R.; Adlercreutz, H.; Aubertin-Leheudre, M. Relationship between essential amino acids and muscle mass, independent of habitual diets, in pre- and post-menopausal US women. *Int J Food Sci Nutr* **2011**, *62*, 719-724, doi:10.3109/09637486.2011.573772.

Ball, M.J.; Ackland, M.L. Zinc intake and status in Australian vegetarians. *The British journal of nutrition* **2000**, *83*, 27-33, doi:10.1017/S0007114500000052.

Barghouti, F.F.; Younes, N.A.; Halaseh, L.J.; Said, T.T.; Ghraiz, S.M. High frequency of low serum levels of vitamin B12 among patients attending Jordan University Hospital. *East Mediterr Health J* **2009**, *15*, 853-860.

Bedford, J.L.; Barr, S.I. Diets and selected lifestyle practices of self-defined adult vegetarians from a population-based sample suggest they are more 'health conscious'. *Int J Behav Nutr Phys Act* **2005**, *2*, 4, doi:10.1186/1479-5868-2-4.

Beezhoid, B.L.; Johnston, C.S.; Daigle, D.R. Vegetarian diets are associated with healthy mood states: a cross-sectional study in seventh day adventist adults. *Nutrition journal* **2010**, *9*, 26-26, doi:10.1186/1475-2891-9-26.

Bhatti, A.S.; Mahida, V.I.; Gupta, S.C. Iron status of Hindu brahmin, Jain and Muslim communities in Surat, Gujarat. *Indian J Hematol Blood Transfus* **2007**, *23*, 82-87, doi:10.1007/s12288-008-0004-0.

Bissoli, L.; Di Francesco, V.; Ballarín, A.; J. Mandragona, R.; Tresca, R.; Brocco, G.; Canuso, B.; Rosello, G.; Zamboni, M. Effect of vegetarian diet on hemoglobin levels. *Annals of nutrition & metabolism* **2002**, *46*, 73-79, doi:10.1159/000057644.

Boacă, M.M.; Colosi, H.A.; Crăciun, E.C. The impact of the lacto-ovo vegetarian diet on the erythrocyte superoxide dismutase activity: a study in the Romanian population. *European journal of clinical nutrition* **2014**, *68*, 184-188, doi:10.1038/ejcn.2013.179.

Brantsæter, A.L.; Knutsen, H.K.; Johnsen, N.C.; Nyheim, K.A.; Erlund, I.; Meltzer, H.M.; Henjum, S. Inadequate Iodine Intake in Population Groups Defined by Age, Life Stage and Vegetarian Dietary Practice in a Norwegian Convenience Sample. *Nutrients* **2018**, *10*, 230, doi:10.3390/nu10020230.

Burns-Whitmore, B.L.; Haddad, E.H.; Sabaté, J.; Jaceldo-Siegl, K.; Tanzman, J.; Rajaram, S. Effect of n-3 fatty acid enriched eggs and organic eggs on serum lutein in free-living lacto-ovo vegetarians. *European journal of clinical nutrition* **2010**, *64*, 1332-1337, doi:10.1038/ejcn.2010.140.

Burns-Whitmore, B.; Haddad, E.; Sabaté, J.; Rajaram, S. Effects of supplementing n-3 fatty acid enriched eggs and walnuts on cardiovascular disease risk markers in healthy free-living lacto-ovo vegetarians: a randomized, crossover, free-living intervention study. *Nutrition journal* **2014**, *13*, 29-29, doi:10.1186/1475-2891-13-29.

Cade, J.E.; Burley, V.J.; Greenwood, D.C.; Group, U.K.W.s.C.S.S. The UK Women's Cohort Study: comparison of vegetarians, fish-eaters and meat-eaters. *Public health nutrition* **2004**, *7*, 871-878, doi:10.1079/phn2004620.

Carmel, R.; Mallidi, P.V.; Vinarsky, S.; Brar, S.; Frouhar, Z. Hyperhomocysteinemia and cobalamin deficiency in young Asian Indians in the United States. *Am J Hematol* **2002**, *70*, 107-114, doi:10.1002/ajh.10093.

Chan, J.; Jaceldo-Siegl, K.; Fraser, G.E. Serum 25-hydroxyvitamin D status of vegetarians, partial vegetarians, and nonvegetarians: the Adventist Health Study-2. *The American journal of clinical nutrition* **2009**, *89*, 1686S-1692S, doi:10.3945/ajcn.2009.26736X.

Chang, C.-M.; Chiu, T.H.-T.; Chang, C.-C.; Lin, M.-N.; Lin, C.-L. Plant-Based Diet, Cholesterol, and Risk of Gallstone Disease: A Prospective Study. *Nutrients* **2019**, *11*, 335, doi:10.3390/nu11020335.

Chiu, T.H.T.; Huang, H.-Y.; Chiu, Y.-F.; Pan, W.-H.; Kao, H.-Y.; Chiu, J.P.C.; Lin, M.-N.; Lin, C.-L. Taiwanese vegetarians and omnivores: dietary composition, prevalence of diabetes and IFG. *PLoS one* **2014**, *9*, e88547-e88547, doi:10.1371/journal.pone.0088547.

Clarys, P.; Deliens, T.; Huybrechts, I.; Derieemaeker, P.; Vanaelst, B.; De Keizer, W.; Hebbelink, M.; Mullie, P. Comparison of nutritional quality of the vegan, vegetarian, semi-vegetarian, pesco-vegetarian and omnivorous diet. *Nutrients* **2014**, *6*, 1332-1332, doi:10.3390/nu6031318.

Clarys, P.; Derieemaeker, P.; Huybrechts, I.; Hebbelink, M.; Mullie, P. Dietary pattern analysis: a comparison between matched vegetarian and omnivorous subjects. *Nutrition journal* **2013**, *12*, 82-82, doi:10.1186/1475-2891-12-82.

Crowe, F.L.; Steur, M.; Allen, N.E.; Appleby, P.N.; Travis, R.C.; Key, T.J. Plasma concentrations of 25-hydroxyvitamin D in meat eaters, fish eaters, vegetarians and vegans: results from the EPIC-Oxford study. *Public Health Nutr* **2011**, *14*, 340-346, doi:10.1017/S1368989010002454.

Damayanti, D.; Jaceldo-Siegl, K.; Beeson, W.L.; Fraser, G.; Oda, K.; Haddad, E.H. Foods and Supplements Associated with Vitamin B12 Biomarkers among Vegetarian and Non-Vegetarian Participants of the Adventist Health Study-2 (AHS-2) Calibration Study. *Nutrients* **2018**, *10*, 722, doi:10.3390/nu10060722.

Davey, G.K.; Spencer, E.A.; Appleby, P.N.; Allen, N.E.; Key, T.J. EPIC-Oxford: lifestyle characteristics and nutrient intakes in a cohort of 33 883 meat-eaters and 31 546 non meat-eaters in the UK. *Public Health Nutr* **2003**, *6*, 259-269, doi:10.1079/PHN2002430.

de Bortoli, M.C.; Cozzolino, S.M.F. Zinc and selenium nutritional status in vegetarians. *Biological trace element research* **2009**, *127*, 228-233, doi:10.1007/s12011-008-9245-1.

Derieemaeker, P.; Aerenhouts, D.; Hebbelink, M.; Clarys, P. Nutrient based estimation of acid-base balance in vegetarians and nonvegetarians. *Plant Foods Hum Nutr* **2010**, *65*, 77-82, doi:10.1007/s11130-009-0149-5.

Derieemaeker, P.; Alewaeters, K.; Hebbelink, M.; Lefevre, J.; Philippaerts, R.; Clarys, P. Nutritional status of Flemish vegetarians compared with non-vegetarians: a matched samples study. *Nutrients* **2010**, *2*, 770-780, doi:10.3390/nu2070770.

Derieemaeker, P.; Aerenhouts, D.; De Ridder, D.; Hebbelink, M.; Clarys, P. Health aspects, nutrition and physical characteristics in matched samples of institutionalized vegetarian and non-vegetarian elderly (> 65yrs). *Nutr Metab (Lond)* **2011**, *8*, 37, doi:10.1186/1743-7075-8-37.

Dyett, P.A.; Sabaté, J.; Haddad, E.; Rajaram, S.; Shavlik, D. Vegan lifestyle behaviors: an exploration of congruence with health-related beliefs and assessed health indices. *Appetite* **2013**, *67*, 119-124, doi:10.1016/j.appet.2013.03.015.

Dyett, P.; Rajaram, S.; Haddad, E.H.; Sabate, J. Evaluation of a validated food frequency questionnaire for self-defined vegans in the United States. *Nutrients* **2014**, *6*, 2523-2539, doi:10.3390/nu6072523.

Elorinne, A.L.; Alftan, G.; Erlund, I.; Kivimäki, H.; Pajä, A.; Salminen, I.; Turpeinen, U.; Voutilainen, S.; Laakso, J. Food and Nutrient Intake and Nutritional Status of Finnish Vegans and Non-Vegetarians. *PLoS one* **2016**, *11*, e0148235-e0148235, doi:10.1371/journal.pone.0148235.

Farmer, B.; Larson, B.T.; Fulgoni, V.L., 3rd; Rainville, A.J.; Liepa, G.U. A vegetarian dietary pattern as a nutrient-dense approach to weight management: an analysis of the national health and nutrition examination survey 1999-2004. *Journal of the American Dietetic Association* **2011**, *111*, 819-827, doi:10.1016/j.jada.2011.03.012.

Fayet, F.; Flood, V.; Petocz, P.; Samman, S. Avoidance of meat and poultry decreases intakes of omega-3 fatty acids, vitamin B12, selenium and zinc in young women. *Journal of human nutrition and dietetics : the official journal of the British Dietetic Association* **2014**, *27 Suppl 2*, 135-142, doi:10.1111/jhn.12092.

Fokkema, M.R.; Brouwer, D.A.; Hasperhoven, M.B.; Hettema, Y.; Bemelmans, W.J.; Muskiet, F.A. Polyunsaturated fatty acid status of Dutch vegans and omnivores. *Prostaglandins Leukot Essent Fatty Acids* **2000**, *63*, 279-285, doi:10.1054/plef.2000.0215.

Fokkema, M.R.; Brouwer, D.A.J.; Hasperhoven, M.B.; Martini, I.A.; Muskiet, F.A.J. Short-term supplementation of low-dose  $\gamma$ -linolenic acid (GLA),  $\alpha$ -linolenic acid (ALA), or GLA plus ALA does not augment LCF  $\omega$  3 status of Dutch vegans to an appreciable extent. *Prostaglandins, Leukotrienes and Essential Fatty Acids (PLEFA)* **2000**, *63*, 287-292, doi:10.1054/plef.2000.0216.

Fokkema, M.R.; van Rieke, H.M.; Baermann, O.J.; Smit, E.N.; Muskiet, F.A. Short-term carnitine supplementation does not augment LC-Pomega3 status of vegans and lacto-ovo-vegetarians. *J Am Coll Nutr* **2005**, *24*, 58-64, doi:10.1080/07315724.2005.10719444.

Gallego-Narbdn, A.; Zapatera, B.; Álvarez, I.; Vaquero, M.P. Methylmalonic Acid Levels and their Relation with Cobalamin Supplementation in Spanish Vegetarians. *Plant Foods Hum Nutr* **2018**, *73*, 166-171, doi:10.1007/s11130-018-0677-y.

Gallego-Narbdn, A.; Zapatera, B.; Barrios, L.; Vaquero, M.P. Vitamin B12 and folate status in Spanish lacto-ovo vegetarians and vegans. *J Nutr Sci* **2019**, *8*, e7-e7, doi:10.1017/jns.2019.2.

Gallego-Narbdn, A.; Zapatera, B.; Vaquero, M.P. Physiological and Dietary Determinants of Iron Status in Spanish Vegetarians. *Nutrients* **2019**, *11*, 1734, doi:10.3390/nu11081734.

Gammon, C.S.; von Hurst, P.R.; Coad, J.; Kruger, R.; Stonehouse, W. Vegetarianism, vitamin B12 status, and insulin resistance in a group of predominantly overweight/obese South Asian women. *Nutrition (Burbank, Los Angeles County, Calif.)* **2012**, *28*, 20-24, doi:10.1016/j.nut.2011.05.006.

Geisel, J.; Schorr, H.; Bodis, M.; Isber, S.; Hübner, U.; Knapp, J.-P.; Obeld, R.; Herrmann, W. The vegetarian lifestyle and DNA methylation. *Clin Chem Lab Med* **2005**, *43*, 1164-1169, doi:10.1515/CCLM.2005.202.

Geppert, J.; Kraft, V.; Demmelmair, H.; Koletzko, B. Docosahexaenoic acid supplementation in vegetarians effectively increases omega-3 index: a randomized trial. *Lipids* **2005**, *40*, 807-814, doi:10.1007/s11745-005-1442-9.

Geppert, J.; Kraft, V.; Demmelmair, H.; Koletzko, B. Microalgal docosahexaenoic acid decreases plasma triacylglycerol in normolipidemic vegetarians: a randomised trial. *The British journal of nutrition* **2006**, *95*, 779-786, doi:10.1079/bjn20051720.

Gilising, A.M.J.; Crowe, F.L.; Lloyd-Wright, Z.; Sanders, T.A.B.; Appleby, P.N.; Allen, N.E.; Key, T.J. Serum concentrations of vitamin B12 and folate in British male omnivores, vegetarians and vegans: results from a cross-sectional analysis of the EPIC-Oxford cohort study. *European journal of clinical nutrition* **2010**, *64*, 933-939, doi:10.1038/ejcn.2010.142.

Goff, L.M.; Bell, J.D.; So, P.W.; Dornhorst, A.; Frost, G.S. Veganism and its relationship with insulin resistance and intramyocellular lipid. *Eur J Clin Nutr* **2005**, *59*, 291-298, doi:10.1038/sj.cjcn.1602076.

Gójdá, J.; Patkova, J.; Jacek, M.; Potockova, J.; Trnka, J.; Kraml, P.; Andel, M. Higher insulin sensitivity in vegans is not associated with higher mitochondrial density. *Eur J Clin Nutr* **2013**, *67*, 1310-1315, doi:10.1038/ejcn.2013.202.

Gómez-Donoso, C.; Martínez-González, M.A.; Martínez, J.A.; Gea, A.; Sanz-Serrano, J.; Perez-Cueto, F.J.A.; Bes-Rastrollo, M. A Provegetarian Food Pattern Emphasizing Preference for Healthy Plant-Derived Foods Reduces the Risk of Overweight/Obesity in the SUN Cohort. *Nutrients* **2019**, *11*, 1553, doi:10.3390/nu11071553.

Gupta, A.K.; Damji, A.; Uppaluri, A. Vitamin B12 deficiency. Prevalence among South Asians at a Toronto clinic. *Can Fam Physician* **2004**, *50*, 743-747.

Haddad, E.H.; Tanzman, J.S. What do vegetarians in the United States eat? *The American journal of clinical nutrition* **2003**, *78*, 626S-632S, doi:10.1093/ajcn/78.3.626S.

Hansen, T.H.; Madsen, M.T.B.; Jørgensen, N.R.; Cohen, A.S.; Hansen, T.; Vestergaard, H.; Pedersen, O.; Allin, K.H. Bone turnover, calcium homeostasis, and vitamin D status in Danish vegans. *European journal of clinical nutrition* **2018**, *72*, 1046-1054, doi:10.1038/s41430-017-0081-y.

Haroon, N.N.; Marwaha, R.K.; Godbole, M.M.; Gupta, S.K. Role of B<sub>12</sub> and homocysteine status in determining BMD and bone turnover in young Indians. *J Clin Densitom* **2012**, *15*, 366-373, doi:10.1016/j.jocd.2012.01.006.

Harvey, L.J.; Armah, C.N.; Dainty, J.R.; Foxall, R.J.; John Lewis, D.; Langford, N.J.; Fairweather-Tait, S.J. Impact of menstrual blood loss and diet on iron deficiency among women in the UK. *The British journal of nutrition* **2005**, *94*, 557-564, doi:10.1079/bjn20051493.

Hawk, S.N.; Englehardt, K.G.; Small, C. Risks of iron deficiency among vegetarian college women. *Health* **2012**, *04*, 113-119, doi:10.4236/health.2012.43018.

He, J.; Shen, X.; Fang, A.; Song, J.; Li, H.; Guo, M.; Li, K. Association between predominantly plant-based diets and iron status in Chinese adults: a cross-sectional analysis. *The British journal of nutrition* **2016**, *116*, 1621-1632, doi:10.1017/S0007114516003639.

Henjum, S.; Brantsæter, A.L.; Kurniasari, A.; Dahl, L.; Aadland, E.K.; Gjengedal, E.L.F.; Birkeland, S.; Aakre, I. Suboptimal Iodine Status and Low Iodine Knowledge in Young Norwegian Women. *Nutrients* **2018**, *10*, 941, doi:10.3390/nu10070941.

Herrmann, W.; Schorr, H.; Purschwitz, K.; Rassoul, F.; Richter, V. Total homocysteine, vitamin B12, and total antioxidant status in vegetarians. *Clin Chem* **2001**, *47*, 1094-1101.

Herrmann, W.; Obeld, R.; Schorr, H.; Geisel, J. Functional vitamin B12 deficiency and determination of holotranscobalamin in populations at risk. *Clin Chem Lab Med* **2003**, *41*, 1478-1488, doi:10.1515/CCLM.2003.227.

Herrmann, W.; Schorr, H.; Obeld, R.; Geisel, J. Vitamin B-12 status, particularly holotranscobalamin II and methylmalonic acid concentrations, and hyperhomocysteinemia in vegetarians. *The American journal of clinical nutrition* **2003**, *78*, 131-136, doi:10.1093/ajcn/78.1.131.

Herrmann, W.; Obeld, R.; Schorr, H.; Geisel, J. The usefulness of holotranscobalamin in predicting vitamin B12 status in different clinical settings. *Curr Drug Metab* **2005**, *6*, 47-53, doi:10.2174/138920052997384.

Herrmann, W.; Obeld, R.; Schorr, H.; Hubner, U.; Geisel, J.; Sand-Hill, M.; Ali, N.; Herrmann, M. Enhanced bone metabolism in vegetarians—the role of vitamin B12 deficiency. *Clin Chem Lab Med* **2009**, *47*, 1381-1387, doi:10.1515/CCLM.2009.302.

Ho-Pham, L.T.; Nguyen, P.L.T.; Le, T.T.T.; Doan, T.A.T.; Tran, N.T.; Le, T.A.; Nguyen, T.V. Veganism, bone mineral density, and body composition: a study in Buddhist nuns. *Osteoporosis international : a journal established as result of cooperation between the European Foundation for Osteoporosis and the National Osteoporosis Foundation of the USA* **2009**, *20*, 2087-2093, doi:10.1007/s00198-009-0916-z.

Ho-Pham, L.T.; Vu, B.Q.; Lai, T.Q.; Nguyen, N.D.; Nguyen, T.V. Vegetarianism, bone loss, fracture and vitamin D: a longitudinal study in Asian vegans and non-vegans. *European journal of clinical nutrition* **2012**, *66*, 75-82, doi:10.1038/ejcn.2011.131.

Hua, N.W.; Stooths, R.A.; Facchini, F.S. Low iron status and enhanced insulin sensitivity in lacto-ovo vegetarians. *Br J Nutr* **2001**, *86*, 515-519, doi:10.1079/bjn20010421.

Huang, Y.-C.; Chang, S.-J.; Chiu, Y.-T.; Chang, H.-H.; Cheng, C.-H. The status of plasma homocysteine and related B-vitamins in healthy young vegetarians and nonvegetarians. *European journal of nutrition* **2003**, *42*, 84-90, doi:10.1007/s00394-003-0387-5.

Huang, C.-J.; Fan, Y.-C.; Liu, J.-F.; Tsai, P.-S. Characteristics and nutrient intake of Taiwanese elderly vegetarians: evidence from a national survey. *The British journal of nutrition* **2011**, *106*, 451-460, doi:10.1017/S0007114511000195.

Huang, T.; Yu, X.; Shou, T.; Wahlgvist, M.L.; Li, D. Associations of plasma phospholipid fatty acids with plasma homocysteine in Chinese vegetarians. *Br J Nutr* **2013**, *109*, 1688-1694, doi:10.1017/S000711451200356X.

Hung, C.-J.; Huang, P.-C.; Lu, S.-C.; Li, Y.-H.; Huang, H.-B.; Lin, B.-F.; Chang, S.-J.; Chou, H.-F. Plasma homocysteine levels in Taiwanese vegetarians are higher than those of omnivores. *The Journal of nutrition* **2002**, *132*, 152-158, doi:10.1093/jn/132.2.152.

Jin, Y.; Kanaya, A.M.; Kandula, N.R.; Rodriguez, L.A.; Talegawkar, S.A. Vegetarian Diets Are Associated with Selected Cardiometabolic Risk Factors among Middle-Older Aged South Asians in the United States. *The Journal of nutrition* **2018**, *148*, 1954-1960, doi:10.1093/jn/nxy217.

Kajanachumpol, S.; Atamasirikul, K.; Viroonudomphol, D. Iron status among Thai Vegans. *J Med Tech Assoc Thailand* **2011**, *39*, 3929-3936.

Karabudak, E.; Kiliztan, G.; Cigerim, N. A comparison of some of the cardiovascular risk factors in vegetarian and omnivorous Turkish females. *Journal of human nutrition and dietetics : the official journal of the British Dietetic Association* **2008**, *21*, 13-22, doi:10.1111/j.1365-277X.2007.00831.x.

Kazimirovic, A.; Barancoková, M.; Krajcovicová-Kudláčková, M.; Volkovová, K.; Staruchová, M.; Valachovicová, M.; Pauková, V.; Blazicek, P.; Wsdlová, L.; Dusinská, M. The relationship between micronutrient in human lymphocytes and selected micronutrients in vegetarians and non-vegetarians. *Mutatis Res* **2006**, *611*, 64-70, doi:10.1016/j.mrgentox.2006.08.001.

Kim, M.-H.; Choi, M.-K.; Sung, C.-J. Bone mineral density of Korean postmenopausal women is similar between vegetarians and nonvegetarians. *Nutrition Research* **2007**, *27*, 612-617, doi:10.1016/j.nutres.2007.07.006.

Kim, M.H.; Bae, Y.J. Postmenopausal vegetarians' low serum ferritin level may reduce the risk for metabolic syndrome. *Biol Trace Elem Res* **2012**, *149*, 34-41, doi:10.1007/s12011-012-9405-x.

Kapoor, A.; Baig, M.; Tunio, S.A.; Memon, A.S.; Karmani, H. Neuropsychiatric and neurological problems among Vitamin B12 deficient young vegetarians. *Neurosciences (Riyadh)* **2017**, *22*, 228-232, doi:10.17712/insj.2017.3.20160445.

Kniskern, M.A.; Johnston, C.S. Protein diets may be inadequate for vegetarians if low amounts of animal protein are consumed. *Nutrition* **2011**, *27*, 727-730, doi:10.1016/j.nut.2010.08.024.

Knurick, J.R.; Johnston, C.S.; Wherry, S.J.; Aguayo, I. Comparison of correlates of bone mineral density in individuals adhering to lacto-ovo, vegan, or omnivore diets: a cross-sectional investigation. *Nutrients* **2015**, *7*, 3416-3426, doi:10.3390/nu7053416.

Johnston, C.S.; Bliss, C.; Knurick, J.R.; Scholtz, C. Rapid Eating Assessment for Participants [shortened version] scores are associated with Healthy Eating Index-2010 scores and other indices of diet quality in healthy adult omnivores and vegetarians. *Nutrition journal* **2018**, *17*, 89-89, doi:10.1186/s12937-018-0399-x.

Kornsteiner, M.; Singer, I.; Elmalfra, I. Very low n-3 long-chain polyunsaturated fatty acid status in Austrian vegetarians and vegans. *Annals of nutrition & metabolism* **2008**, *52*, 37-47, doi:10.1159/000118629.

Kotova, N.; Frost, C.; Abramsson-Zetterberg, L.; Tareke, E.; Bergman, R.; Haghdoust, S.; Paulsson, B.; Törnqvist, M.; Segerbäck, D.; Jensen, D., et al. Differences in micronutrient frequency and acrylamide adduct levels with hemoglobin between vegetarians and non-vegetarians. *European journal of nutrition* **2015**, *54*, 1181-1190, doi:10.1007/s00394-014-0796-7.

Krajcovicová-Kudláčková, M.; Blazicek, P.; Babinska, K.; Kopcova, J.; Klvanova, J.; Bederova, A.; Magalova, T. Traditional and alternative nutrition—levels of homocysteine and lipid parameters in adults. *Scand J Clin Lab Invest* **2000**, *60*, 657-664.

Krajcovicová-Kudláčková, M.; Ursinyova, M.; Blazicek, P.; Spustova, V.; Ginter, E.; Hladikova, V.; Klvanova, J. Free radical disease prevention and nutrition. *Bratislav Lek Listy* **2003**, *104*, 64-68.

Krajcovicová-Kudláčková, M.; Bučková, K.; Klimeš, I.; Šeboková, E. Iodine Deficiency in Vegetarians and Vegans. *Annals of Nutrition and Metabolism* **2003**, *47*, 183-185, doi:10.1159/000070483.

Krajcovicová-Kudláčková, M.; Blazicek, P.; Mislanova, C.; Valachovicova, M.; Paukova, V.; Spustova, V. Nutritional determinants of plasma homocysteine. *Bratislav Lek Listy* **2007**, *108*, 510-515.

Krajcovicová-Kudláčková, M.; Babinska, K.; Blazicek, P.; Valachovicova, M.; Spustova, V.; Mislanova, C.; Paukova, V. Selected biomarkers of age-related diseases in older subjects with different nutrition. *Bratislav Lek Listy* **2011**, *112*, 610-613.

Krajcovicová-Kudláčková, M.; Valachovicová, M.; Blazicek, P. Seasonal folate serum concentrations at different nutrition. *Cent Eur J Public Health* **2013**, *21*, 36-38.

Kristensen, N.B.; Madsen, M.L.; Hansen, T.H.; Allin, K.H.; Hoppe, C.; Fagt, S.; Lausten, M.S.; Gøbel, R.J.; Vestergaard, H.; Hansen, T., et al. Intake of macro- and micronutrients in Danish vegans. *Nutrition journal* **2015**, *14*, 115-115, doi:10.1186/s12937-015-0103-3.

Krivosiková, Z.; Krajcovicová-Kudláčková, M.; Spustová, V.; Stefková, K.; Valachovicová, M.; Blazicek, P.; Němcová, T. The association between high plasma homocysteine levels and lower bone mineral density in Slovak women: the impact of vegetarian diet. *European journal of nutrition* **2010**, *49*, 147-153, doi:10.1007/s00394-009-0059-1.

Kuchta, A.; Lebieczinska, A.; Fijalkowski, M.; Galaska, R.; Kreft, E.; Toton, M.; Czaja, K.; Kozłowska, A.; Cwiklinska, A.; Kortas-Stempak, B., et al. Impact of plant-based diet on lipid risk factors for atherosclerosis. *Cardiol J* **2016**, *23*, 141-148, doi:10.5603/CJ.a.2016.0002.

Kwok, T.; Cheng, G.; Woo, J.; Lai, W.K.; Pang, C.P. Independent effect of vitamin B12 deficiency on hematological status in older Chinese vegetarian women. *Am J Hematol* **2002**, *70*, 186-190, doi:10.1002/ajh.10134.

Kwok, T.; Cheng, G.; Lai, W.K.; Poon, P.; Woo, J.; Pang, C.P. Use of fasting urinary methylmalonic acid to screen for metabolic vitamin B12 deficiency in older persons. *Nutrition* **2004**, *20*, 764-768, doi:10.1016/j.nut.2004.06.001.

Kwok, T.; Chook, P.; Qiao, M.; Tam, L.; Poon, Y.K.P.; Ahuja, A.T.; Woo, J.; Celermajer, D.S.; Woo, K.S. Vitamin B-12 supplementation improves arterial function in vegetarians with subnormal vitamin B-12 status. *The Journal of nutrition, health & aging* **2012**, *16*, 569-573, doi:10.1007/s12603-012-0036-x.

Leblanc, J.C.; Yoon, H.; Kombadjian, A.; Verger, P. Nutritional intakes of vegetarian populations in France. *European journal of clinical nutrition* **2000**, *54*, 443-449, doi:10.1038/sj.ejcn.1600967.

Lee, H.Y.; Woo, J.; Chen, Z.Y.; Leung, S.F.; Peng, X.H. Serum fatty acid, lipid profile and dietary intake of Hong Kong Chinese omnivores and vegetarians. *European journal of clinical nutrition* **2000**, *54*, 768-773, doi:10.1038/sj.ejcn.1601089.

Lee, Y.; Krawinkel, M. The nutritional status of iron, folate, and vitamin B-12 of Buddhist vegetarians. *Asia Pacific journal of clinical nutrition* **2011**, *20*, 42-49.

Leonard, A.J.; Chalmers, K.A.; Collins, C.E.; Patterson, A.J. The effect of nutrition knowledge and dietary iron intake on iron status in young women. *Appetite* **2014**, *81*, 225-231, doi:10.1016/j.appet.2014.06.021.

Leung, A.M.; Laman, A.; Ho, X.; Braverman, L.E.; Pearce, E.N. Iodine status and thyroid function of Boston-area vegetarians and vegans. *The Journal of clinical endocrinology and metabolism* **2011**, *96*, E1303-E1307, doi:10.1210/jc.2011.0256.

Li, D.; Sinclair, A.J.; Mann, N.J.; Turner, A.; Ball, M.J. Selected micronutrient intake and status in men with differing meat intakes, vegetarians and vegans. *Asia Pac J Clin Nutr* **2009**, *9*, 18-23, doi:10.1046/j.1440-6047.2000.00129.x.

Lightowler, H.J.; Davies, G.J. Non-starch polysaccharide intake in vegans and the relationship with energy distribution and mineral intakes. *J Hum Nutr Dietet* **2000**, *13*, 443-450.

Lightowler, H.J.; Davies, G.J. Micronutrient intakes in a group of UK vegans and the contribution of self-selected dietary supplements. *J R Soc Promot Health* **2000**, *120*, 117-124, doi:10.1177/146642400012000210.

Lloyd-Wright, Z.; Preston, R.; Gray, R.; Key, T.; Sanders, T. Randomized placebo controlled trial of a daily intake of 200mg docosahexaenoic acid in vegans. *Proc. Nutr. Soc.* **2003**, *62*, 42A.

Lütjohann, D.; Meyer, S.; von Bergmann, K.; Stellaard, F. Cholesterol Absorption and Synthesis in Vegetarians and Omnivores. *Mol Nutr Food Res* **2018**, *62*, e1700689-e1700689, doi:10.1002/mnfr.201700689.

Mađry, E.; Lisowska, A.; Grebowiec, P.; Walkowiak, J. The impact of vegan diet on B-12 status in healthy omnivores: five-year prospective study. *Acta Sci Pol Technol Aliment* **2012**, *11*, 209-212.

Majchrzak, D.; Singer, I.; Männer, M.; Rust, P.; Genser, D.; Wagner, K.H.; Elmadaf, I. B-vitamine status and concentrations of homocysteine in Austrian omnivores, vegetarians and vegans. *Annals of nutrition & metabolism* **2006**, *50*, 485-491, doi:10.1159/000095828.

Manjari, V.; Suresh, Y.; Sailaja Devi, M.M.; Das, U.N. Oxidant stress, anti-oxidants and essential fatty acids in South Indian vegetarians and non-vegetarians. *Prostaglandins Leukot Essent Fatty Acids* **2001**, *64*, 53-59, doi:10.1054/plef.2000.0237.

Mann, N.; Pirodda, Y.; O'Connell, S.; Li, D.; Kelly, F.; Sinclair, A. Fatty acid composition of habitual omnivore and vegetarian diets. *Lipids* **2006**, *41*, 637-646, doi:10.1007/s11745-006-5014-9.

Mearns, G.J.; Rush, E.C. Screening for inadequate dietary vitamin B-12 intake in South Asian women using a nutrient-specific, semi-quantitative food frequency questionnaire. *Asia Pacific journal of clinical nutrition* **2017**, *26*, 1119-1124, doi:10.6133/apjcn.112016.06.

Montalcini, T.; De Bonis, D.; Ferro, Y.; Carè, J.; Accattato, F.; Greco, M.; Foti, D.; Romeo, S.; Gulletta, E., et al. High Vegetable Fats Intake Is Associated with High Resting Energy Expenditure in Vegetarians. *Nutrients* **2015**, *7*, 5933-5947, doi:10.3390/nu7075259.

Morad, M.; Gringols, M.; Kandel, I.; Merrick, J. Vitamin B12 deficiency in persons with intellectual disability in a vegetarian residential care community. *ScientificWorldJournal* **2005**, *5*, 58-61, doi:10.1100/tsw.2005.11.

Naik, S.; Bhidé, V.; Babhulkar, A.; Mahalle, N.; Parab, S.; Thakre, R.; Kulkarni, M. Daily milk intake improves vitamin B-12 status in young vegetarian Indians: an intervention trial. *Nutrition journal* **2013**, *12*, 136-136, doi:10.1186/1475-2891-12-136.

Naik, S.; Mahalle, N.; Bhidé, V. Identification of vitamin B12 deficiency in vegetarian Indians. *The British journal of nutrition* **2018**, *119*, 629-635, doi:10.1017/S0007114518000900.

Nakamoto, K.; Watanabe, S.; Kudo, H.; Tanaka, A. Nutritional characteristics of middle-aged Japanese vegetarians. *J Atheroscler Thromb* **2008**, *15*, 122-129, doi:10.5551/jat.e646.

Nebi, J.; Haufe, S.; Eigendorff, J.; Wasserfurth, P.; Tegtbaur, U.; Hahn, A. Exercise capacity of vegan, lacto-ovo-vegetarian and omnivorous recreational runners. *Journal of the International Society of Sports Nutrition* **2019**, *16*, 23-23, doi:10.1186/s12970-019-0289-4.

Nebi, J.; Schuchardt, J.P.; Ströhle, A.; Wasserfurth, P.; Haufe, S.; Eigendorff, J.; Tegtbaur, U.; Hahn, A. Micronutrient Status of Recreational Runners with Vegetarian or Non-Vegetarian Dietary Patterns. *Nutrients* **2019**, *11*, 1146, doi:10.3390/nu11051146.

Obeid, R.; Geisel, J.; Schorr, H.; Hübner, U.; Herrmann, W. The impact of vegetarianism on some haematological parameters. *Eur J Haematol* **2002**, *69*, 275-279, doi:10.1034/j.1600-0609.2002.02798.x.

Obeid, R.; Awwad, H.M.; Keller, M.; Geisel, J. Trimethylamine-N-oxide and its biological variations in vegetarians. *European journal of nutrition* **2017**, *56*, 2599-2609, doi:10.1007/s00394-016-1295-9.

Outila, T.A.; Karkkainen, M.U.; Seppanen, R.H.; Lamberg-Allardt, C.J. Dietary intake of vitamin D in premenopausal, healthy vegans was insufficient to maintain concentrations of serum 25-hydroxyvitamin D and intact parathyroid hormone within normal ranges during the winter in Finland. *J Am Diet Assoc* **2000**, *100*, 434-441, doi:10.1016/S0002-8223(00)00134-6.

Outila, T.A.; Lamberg-Allardt, C.J. Ergocalciferol supplementation may positively affect lumbar spine bone mineral density of vegans. *J Am Diet Assoc* **2000**, *100*, 629, doi:10.1016/S0002-8223(00)00184-X.

Pinto, A.M.; Sanders, T.A.B.; Kendall, A.C.; Nicolau, A.; Gray, R.; Al-Khatib, H.; Hall, W.L. A comparison of heart rate variability, n-3 PUFA status and lipid mediator profile in age- and BMI-matched middle-aged vegans and omnivores - CORRIGENDUM. *Br J Nutr* **2017**, *118*, 877, doi:10.1017/S0007114517002628.

Raghunath, R.; Tripathi, R.M.; Suseela, B.; Bhalke, S.; Shukla, V.K.; Puranik, V.D. Dietary intake of metals by Mumbai adult population. *Sci Total Environ* **2006**, *356*, 62-68, doi:10.1016/j.scitotenv.2005.04.035.

Rizzo, N.S.; Jaceldo-Siegl, K.; Sabate, J.; Fraser, G.E. Nutrient profiles of vegetarian and nonvegetarian dietary patterns. *Journal of the Academy of Nutrition and Dietetics* **2013**, *113*, 1610-1619, doi:10.1016/j.jand.2013.06.349.

Rosell, M.S.; Lloyd-Wright, Z.; Appleby, P.N.; Sanders, T.A.B.; Allen, N.E.; Key, T.J. Long-chain n-3 polyunsaturated fatty acids in plasma in British meat-eating, vegetarian, and vegan men. *The American journal of clinical nutrition* **2005**, *82*, 327-334, doi:10.1093/ajcn.82.2.327.

Sanders, T. DHA status of vegetarians. *Prostaglandins, Leukotrienes and Essential Fatty Acids (PLEFA)* **2009**, *81*.

Sanders, T.A.B. Plant compared with marine n-3 fatty acid effects on cardiovascular risk factors and outcomes: what is the verdict? *The American journal of clinical nutrition* **2014**, *100 Suppl 1*, 453S-458S, doi:10.3945/ajcn.113.071555.

Salvador, A.M.; Garcia-Maldonado, E.; Gallego-Narbon, A.; Zapatera, B.; Vaquero, M.P. Fatty Acid Profile and Cardiometabolic Markers in Relation with Diet Type and Omega-3 Supplementation in Spanish Vegetarians. *Nutrients* **2019**, *11*, 1659, doi:10.3390/nu11071659.

Sarter, B.; Kelsey, K.S.; Schwartz, T.A.; Harris, M.S. Blood docosahexaenoic acid and eicosapentaenoic acid in vegans: Associations with age and gender and effects of an algal-derived omega-3 fatty acid supplement. *Clin Nutr* **2015**, *34*, 212-218, doi:10.1016/j.clnu.2014.03.003.

Schwarz, J.; Dischietz, T.; Schwarz, J.; Dura, A.; Nelle, E.; Watanabe, F.; Wintgens, K.F.; Reich, M.; Armbruster, F.P. The influence of a whole food vegan diet with Nori algae and wild mushrooms on selected blood parameters. *Clin Lab* **2014**, *60*, 2039-2050, doi:10.7754/clin.lab.2014.140527.

Schlesier, K.; Kühn, B.; Kiehnopf, M.; Winnefeld, K.; Roskos, M.; Bitsch, R.; Böhm, V. Comparative evaluation of green and black tea consumption on the iron status of omnivorous and vegetarian people. *Food Research International* **2012**, *46*, 522-527, doi:10.1016/j.foodres.2011.06.019.

Schlipbach, R.; Wegmüller, R.; Berguerand, C.; Bui, M.; Herter-Aeberli, I. Micronutrient status and intake in omnivores, vegetarians and vegans in Switzerland. *European journal of nutrition* **2017**, *56*, 283-293, doi:10.1007/s00394-015-1079-7.

Sellmeyer, D.E.; Stone, K.L.; Sebastian, A.; Cummings, S.R. A high ratio of dietary animal to vegetable protein increases the rate of bone loss and the risk of fracture in postmenopausal women. *Am J Clin Nutr* **2001**, *73*, 118-122.

Shridhar, K.; Dhillon, P.K.; Bowen, L.; Kinra, S.; Bharathi, A.V.; Prabhakaran, D.; Reddy, K.S.; Ebrahim, S. Nutritional profile of Indian vegetarian diets—the Indian Migration Study (IMS). *Nutrition journal* **2014**, *13*, 55-55, doi:10.1186/1475-2891-13-55.

Śliwińska, A.; Luty, J.; Aleksandrowicz-Wrona, E.; Malgorzewicz, S. Iron status and dietary iron intake in vegetarians. *Adv Clin Exp Med* **2018**, *27*, 1383-1389, doi:10.17219/acem/70527.

Sobiecki, J.G.; Appleby, P.N.; Bradbury, K.E.; Key, T.J. High compliance with dietary recommendations in a cohort of meat eaters, fish eaters, vegetarians, and vegans: results from the European Prospective Investigation into Cancer and Nutrition-Oxford study. *Nutrition research (New York, N.Y.)* **2016**, *36*, 464-477, doi:10.1016/j.nutres.2015.12.016.

Somannavar, M.S.; Kodliwadmath, M.V. Correlation between oxidative stress and antioxidant defence in South Indian urban vegetarians and non-vegetarians. *Eur Rev Med Pharmacol Sci* **2012**, *16*, 351-354.

Su, T.-C.; Jeng, J.-S.; Wang, J.-D.; Torng, P.-L.; Chang, S.-J.; Chen, C.-F.; Liau, C.-S. Homocysteine, circulating vascular cell adhesion molecule and carotid atherosclerosis in postmenopausal vegetarian women and omnivores. *Atherosclerosis* **2006**, *184*, 356-362, doi:10.1016/j.atherosclerosis.2005.04.022.

Su, T.-C.; Torng, P.-L.; Jeng, J.-S.; Chen, M.-F.; Liau, C.-S. Arterial function of carotid and brachial arteries in postmenopausal vegetarians. *Vasc Health Risk Manag* **2011**, *7*, 517-523, doi:10.2147/VHRM.S18881.

Vinagre, J.C.; Vinagre, C.G.; Pozzi, F.S.; Shylwicz, E.; Marañhao, R.C. Metabolism of triglyceride-rich lipoproteins and transfer of lipids to high-density lipoproteins (HDL) in vegan and omnivore subjects. *Nutr Metab Cardiovasc Dis* **2013**, *23*, 61-67, doi:10.1016/j.numecd.2011.02.011.

Waldmann, A.; Koschitzke, J.W.; Leitzmann, C.; Hahn, A. Dietary intakes and lifestyle factors of a vegan population in Germany: results from the German Vegan Study. *European journal of clinical nutrition* **2003**, *57*, 947-955, doi:10.1038/sj.ejcn.1601629.

Waldmann, A.; Koschitzke, J.W.; Leitzmann, C.; Hahn, A. Homocysteine and cobalamin status in German vegans. *Public health nutrition* **2004**, *7*, 467-472, doi:10.1079/PHN.2003540.

Waldmann, A.; Koschitzke, J.W.; Leitzmann, C.; Hahn, A. German vegan study: diet, life-style factors, and cardiovascular risk profile. *Annals of nutrition & metabolism* **2005**, *49*, 366-372, doi:10.1159/000088888.

Welch, A.A.; Shakya-Shrestha, S.; Lentjes, M.A.; Wareham, N.J.; Khaw, K.T. Dietary intake and status of n-3 polyunsaturated fatty acids in a population of fish-eating and non-fish-eating meat-eaters, vegetarians, and vegans and the product-precursor ratio [corrected] of alpha-linolenic acid to long-chain n-3 polyunsaturated fatty acids: results from the EPIC-Norfolk cohort. *Am J Clin Nutr* **2010**, *92*, 1040-1051, doi:10.3945/ajcn.2010.29457.

Wójciak, R.W.; Krejpcio, Z.; Czaplak-Matyasik, M.; Jeszka, J. Comparison of the hair bioelements in vegetarian and non-vegetarian women. *Trace Elements and Electrolytes* **2004**, *21*, 141-144, doi:10.5414/tep21141.

Wongprachum, K.; Sanchaisuriya, K.; Sanchaisuriya, P.; Sirdamrongvattana, S.; Manpeun, S.; Schlep, F.P. Proxy indicators for identifying iron deficiency among anemic vegetarians in an area prevalent for thalassemia and hemoglobinopathies. *Acta Haematol* **2012**, *127*, 250-255, doi:10.1159/000337032.

Wu, W.H.; Lu, S.C.; Wang, T.F.; Jou, H.J.; Wang, T.A. Effects of docosahexaenoic acid supplementation on blood lipids, estrogen metabolism, and in vivo oxidative stress in postmenopausal vegetarian women. *European journal of clinical nutrition* **2006**, *60*, 386-392, doi:10.1038/sj.ejcn.1602328.

Xie, L.; Wang, B.; Cui, X.; Tang, Q.; Cai, W.; Shen, X. Young adult vegetarians in Shanghai have comparable bone health to omnivores despite lower serum 25(OH) vitamin D in vegans: a cross-sectional study. *Asia Pacific journal of clinical nutrition* **2019**, *28*, 383-388, doi:10.6133/apjcn.201906\_28(2).0021.

Yen, C.-E.; Yen, C.-H.; Huang, M.-C.; Cheng, C.-H.; Huang, Y.-C. Dietary intake and nutritional status of vegetarian and omnivorous preschool children and their parents in Taiwan. *Nutrition research (New York, N.Y.)* **2008**, *28*, 430-436, doi:10.1016/j.nutres.2008.03.012.

Yen, C.-E.; Yen, C.-H.; Cheng, C.-H.; Huang, Y.-C. Vitamin B-12 status is not associated with plasma homocysteine in parents and their preschool children: lacto-ovo, lacto, and ovo vegetarians and omnivores. *Journal of the American College of Nutrition* **2010**, *29*, 7-13, doi:10.1080/07315724.2010.10719811.

Yep, Y.L.; Li, D.; Mann, N.J.; Bode, O.; Sinclair, A.J. Bread enriched with microencapsulated tuna oil increases plasma docosahexaenoic acid and total omega-3 fatty acids in humans. *Asia Pacific J Clin Nutr* **2002**, *11*, 285-291.
