# Supplementary material for: Nutrient Intake and Status in Adults Consuming Plant-Based Diets Compared to Meat-Eaters: A Systematic Review
Source: MDPI journal article supplement (doi:10.3390/nu14010029), 2021-12-23
Supplement: s1 [file s1]

**Supplementary Table S2: Nutritional status, hemoglobin, and bone marker data per dietary pattern**

|                             | all studies |             |        | Studies among non-users of supplements |             |        | Studies among users & non-users of supplements |             |        |
|-----------------------------|-------------|-------------|--------|----------------------------------------|-------------|--------|------------------------------------------------|-------------|--------|
|                             | meat eaters | vegetarians | vegans | meat eaters                            | vegetarians | vegans | meat eaters                                    | vegetarians | vegans |
| <b>Vitamin B12 (pmol/l)</b> |             |             |        |                                        |             |        |                                                |             |        |
| number of studies           | 34          | 42          | 21     | 19                                     | 24          | 8      | 15                                             | 18          | 13     |
| mean                        | 309.0       | 218.0       | 221.9  | 301.4                                  | 205.7       | 200.3  | 318.6                                          | 234.4       | 358.0  |
| median                      | 309.6       | 215.5       | 203.2  | 310.9                                  | 204.1       | 195.0  | 308.8                                          | 225.3       | 203.2  |
| min                         | 113.4       | 108.5       | 122.0  | 113.4                                  | 108.5       | 138.7  | 229.3                                          | 145.0       | 122.0  |
| max                         | 445.0       | 354.0       | 358.0  | 403.5                                  | 326.0       | 269.3  | 445.0                                          | 354.0       | 358.0  |
| p25                         | 278.6       | 177.0       | 159.0  | 275.75                                 | 169.4       | 156.1  | 279.4                                          | 210.7       | 177.3  |
| p75                         | 340.5       | 246.7       | 275.7  | 327.5                                  | 246.2       | 245.4  | 352.1                                          | 259.0       | 296.9  |
| <b>Folate (nmol/l)</b>      |             |             |        |                                        |             |        |                                                |             |        |
| number of studies           | 32          | 36          | 14     | 17                                     | 19          | 5      | 15                                             | 17          | 9      |
| mean                        | 19.0        | 23.6        | 29.2   | 17.1                                   | 21.3        | 23.8   | 21.2                                           | 26.2        | 32.2   |
| median                      | 18.4        | 22.6        | 33.1   | 18.0                                   | 20.1        | 17.5   | 22.7                                           | 24.7        | 35.0   |
| min                         | 7.6         | 9.6         | 15.6   | 7.6                                    | 9.6         | 15.6   | 11.9                                           | 17.4        | 20.2   |
| max                         | 29.2        | 39.4        | 40.7   | 25.1                                   | 39.4        | 36.0   | 29.2                                           | 38.4        | 40.7   |
| p25                         | 13.8        | 19.1        | 20.7   | 12.8                                   | 15.4        | 16.8   | 16.5                                           | 19.8        | 22.7   |
| p75                         | 24.4        | 28.1        | 21.2   | 20.0                                   | 24.1        | 33.1   | 26.5                                           | 32.9        | 37.9   |
| <b>Vitamin B6 (nmol/l)</b>  |             |             |        |                                        |             |        |                                                |             |        |
| number of studies           | 11          | 10          | 4      | 4                                      | 4           | 0      | 7                                              | 6           | 4      |
| mean                        | 66.2        | 69.3        | 60.1   | 50.9                                   | 45.0        | n.a.   | 76.4                                           | 85.5        | 60.1   |
| median                      | 65.3        | 59.0        | 59.0   | 48.3                                   | 46.8        | n.a.   | 67.3                                           | 70.1        | 59.0   |
| min                         | 15.9        | 24.1        | 14.0   | 21.2                                   | 28.0        | n.a.   | 15.9                                           | 24.1        | 14.0   |
| max                         | 149.2       | 167.5       | 108.5  | 85.9                                   | 58.5        | n.a.   | 149.2                                          | 167.5       | 108.5  |
| p25                         | 36.4        | 46.6        | 14.0   | 29.2                                   | 41.8        | n.a.   | 54.0                                           | 59.6        | 46.4   |
| p75                         | 81.6        | 75.2        | 108.5  | 69.9                                   | 50.0        | n.a.   | 98.7                                           | 111.5       | 72.7   |
| <b>Vitamin C (μmol/l)</b>   |             |             |        |                                        |             |        |                                                |             |        |
| number of studies           | 7           | 7           | 3      | 4                                      | 4           | 1      | 3                                              | 3           | 2      |
| mean                        | 44.9        | 62.7        | 61.9   | 46.7                                   | 66.7        | 71.8   | 42.4                                           | 57.5        | 57.0   |
| median                      | 45.1        | 61.0        | 71.8   | 50.0                                   | 63.6        | 71.8   | 44.9                                           | 61.0        | 57.0   |
| min                         | 29.8        | 33.6        | 37.1   | 31.5                                   | 58.0        | 71.8   | 29.8                                           | 33.6        | 37.1   |
| max                         | 55.4        | 81.5        | 76.8   | 55.4                                   | 81.5        | 71.8   | 52.6                                           | 77.9        | 76.8   |
| p25                         | 38.2        | 58.1        | 54.5   | 41.7                                   | 58.2        | n.a.   | 37.3                                           | 47.3        | 47.0   |
| p75                         | 53.8        | 73.4        | 74.3   | 55.0                                   | 72.1        | n.a.   | 48.7                                           | 69.5        | 66.9   |
| <b>Vitamin D (μg/l)</b>     |             |             |        |                                        |             |        |                                                |             |        |
| number of studies           | 12          | 9           | 9      | 5                                      | 4           | 4      | 7                                              | 5           | 5      |
| mean                        | 26.2        | 22.7        | 21.9   | 22.4                                   | 19.6        | 20.1   | 29.0                                           | 25.2        | 23.4   |
| median                      | 26.5        | 26.1        | 22.3   | 22.0                                   | 17.6        | 20.1   | 30.8                                           | 26.4        | 22.3   |
| min                         | 14.7        | 13.6        | 10.8   | 14.7                                   | 13.6        | 10.8   | 17.6                                           | 16.4        | 15.0   |
| max                         | 38.4        | 30.7        | 34.5   | 32.9                                   | 29.5        | 29.5   | 38.4                                           | 30.7        | 34.5   |
| p25                         | 20.7        | 17.0        | 17.7   | 15.6                                   | 16.5        | 16.0   | 24.0                                           | 26.1        | 22.2   |
| p75                         | 31.9        | 26.4        | 22.9   | 26.5                                   | 20.7        | 24.2   | 33.9                                           | 26.4        | 22.9   |
| <b>Vitamin E (μmol/l)</b>   |             |             |        |                                        |             |        |                                                |             |        |
| number of studies           | 6           | 7           | 4      | 3                                      | 4           | 2      | 3                                              | 3           | 2      |
| mean                        | 25.4        | 25.5        | 20.5   | 25.3                                   | 23.2        | 17.1   | 25.6                                           | 28.6        | 24.0   |
| median                      | 26.3        | 24.2        | 33.8   | 26.0                                   | 21.8        | 17.1   | 26.6                                           | 30.0        | 24.0   |
| min                         | 12.5        | 12.7        | 12.1   | 12.5                                   | 12.7        | 12.1   | 22.2                                           | 24.2        | 16.8   |
| max                         | 37.4        | 36.6        | 31.2   | 37.4                                   | 36.6        | 22.1   | 27.9                                           | 31.6        | 31.2   |
| p25                         | 23.2        | 21.8        | 21.8   | 19.2                                   | 18.9        | 14.6   | 24.4                                           | 27.1        | 20.4   |
| p75                         | 27.6        | 30.8        | 30.8   | 31.7                                   | 26.2        | 19.6   | 27.2                                           | 30.8        | 27.6   |
| <b>β-caroten (μmol/l)</b>   |             |             |        |                                        |             |        |                                                |             |        |
| number of studies           | 3           | 4           | 1      | 1                                      | 2           | 0      | 2                                              | 2           | 1      |
| mean                        | 0.8         | 0.4         | 0.8    | 0.2                                    | 0.4         | n.a.   | 1.1                                            | 0.4         | 0.8    |
| median                      | 0.3         | 0.4         | 0.8    | 0.2                                    | 0.4         | n.a.   | 1.1                                            | 0.4         | 0.8    |
| min                         | 0.2         | 0.2         | 0.8    | 0.2                                    | 0.24        | n.a.   | 0.3                                            | 0.3         | 0.8    |
| max                         | 1.9         | 0.6         | 0.8    | 0.2                                    | 0.56        | n.a.   | 1.9                                            | 0.4         | 0.8    |
| p25                         | 0.3         | 0.3         | n.a.   | n.a.                                   | 0.32        | n.a.   | 0.7                                            | 0.3         | n.a.   |
| p75                         | 1.1         | 0.4         | n.a.   | n.a.                                   | 0.48        | n.a.   | 1.5                                            | 0.4         | n.a.   |

|                             | all studies |             |        | Studies among non-users of supplements |             |        | Studies among users & non-users of supplements |             |        |
|-----------------------------|-------------|-------------|--------|----------------------------------------|-------------|--------|------------------------------------------------|-------------|--------|
|                             | meat eaters | vegetarians | vegans | meat eaters                            | vegetarians | vegans | meat eaters                                    | vegetarians | vegans |
| <b>Ferritin (µg/l)</b>      |             |             |        |                                        |             |        |                                                |             |        |
| number of studies           | 14          | 14          | 5      | 9                                      | 9           | 1      | 5                                              | 5           | 4      |
| mean                        | 55.5        | 33.8        | 31.3   | 47.2                                   | 28.8        | 50.0   | 70.5                                           | 42.0        | 26.6   |
| median                      | 43.3        | 31.9        | 32.1   | 41.6                                   | 28.0        | 50.0   | 78.8                                           | 37.1        | 30.2   |
| min                         | 12.9        | 12.6        | 13.4   | 12.9                                   | 12.6        | 50.0   | 21.1                                           | 20.5        | 13.4   |
| max                         | 120.7       | 73.4        | 50.0   | 120.7                                  | 48.0        | 50.0   | 103.5                                          | 73.4        | 32.7   |
| p25                         | 29.9        | 24.2        | 28.3   | 28.4                                   | 23.5        | n.a.   | 62.2                                           | 31.2        | 24.6   |
| p75                         | 77.1        | 38.3        | 32.7   | 44.3                                   | 33.1        | n.a.   | 86.7                                           | 47.9        | 32.3   |
| <b>Zinc (mg/l)</b>          |             |             |        |                                        |             |        |                                                |             |        |
| number of studies           | 6           | 7           | 3      | 3                                      | 4           | 1      | 3                                              | 3           | 2      |
| mean                        | 0.90        | 0.81        | 0.79   | 0.91                                   | 0.80        | 0.72   | 0.89                                           | 0.90        | 0.82   |
| median                      | 0.92        | 0.78        | 0.80   | 0.93                                   | 0.77        | 0.72   | 0.91                                           | 0.88        | 0.82   |
| min                         | 0.9         | 0.7         | 0.7    | 0.85                                   | 0.66        | 0.72   | 0.85                                           | 0.87        | 0.80   |
| max                         | 1.0         | 1.0         | 0.8    | 0.95                                   | 0.99        | 0.72   | 0.92                                           | 0.96        | 0.84   |
| p25                         | 0.87        | 0.76        | 0.76   | 0.89                                   | 0.74        | n.a.   | 0.88                                           | 0.88        | 0.81   |
| p75                         | 0.93        | 0.88        | 0.82   | 0.94                                   | 0.83        | n.a.   | 0.92                                           | 0.92        | 0.83   |
| <b>Iodine (µg/l)</b>        |             |             |        |                                        |             |        |                                                |             |        |
| number of studies           | 5           | 5           | 5      | 0                                      | 0           | 0      | 5                                              | 5           | 5      |
| mean                        | 111.2       | 102.8       | 105.0  | n.a.                                   | n.a.        | n.a.   | 111.2                                          | 102.8       | 105.0  |
| median                      | 90.8        | 100.0       | 62.3   | n.a.                                   | n.a.        | n.a.   | 90.8                                           | 100.0       | 62.3   |
| min                         | 47.2        | 39.3        | 13.2   | n.a.                                   | n.a.        | n.a.   | 47.2                                           | 39.3        | 13.2   |
| max                         | 216.0       | 172.0       | 282.1  | n.a.                                   | n.a.        | n.a.   | 216.0                                          | 172.0       | 282.1  |
| p25                         | 75.6        | 80.8        | 38.3   | n.a.                                   | n.a.        | n.a.   | 75.6                                           | 80.8        | 38.3   |
| p75                         | 126.5       | 121.9       | 129.0  | n.a.                                   | n.a.        | n.a.   | 126.5                                          | 121.9       | 129.0  |
| <b>Hemoglobin (g/l)</b>     |             |             |        |                                        |             |        |                                                |             |        |
| number of studies           | 10          | 14          | 8      | 6                                      | 8           | 3      | 4                                              | 6           | 5      |
| mean                        | 139.2       | 135.6       | 140.2  | 139.2                                  | 135.4       | 141.8  | 139.2                                          | 135.9       | 139.2  |
| median                      | 138.8       | 136.0       | 140.1  | 138.5                                  | 135.5       | 143.3  | 138.8                                          | 136.2       | 139.8  |
| min                         | 130.0       | 126.7       | 135.0  | 130.0                                  | 126.7       | 135.0  | 136.3                                          | 130.0       | 135.0  |
| max                         | 149.6       | 146.0       | 147.0  | 149.6                                  | 146.0       | 147.0  | 143.0                                          | 140.6       | 141.0  |
| p25                         | 135.7       | 130.9       | 138.5  | 134.3                                  | 129.3       | 139.2  | 138.0                                          | 134.3       | 139.7  |
| p75                         | 142.6       | 138.8       | 141.6  | 144.1                                  | 139.6       | 145.2  | 140.0                                          | 138.2       | 140.4  |
| <b>PTH (pmol/l)</b>         |             |             |        |                                        |             |        |                                                |             |        |
| number of studies           | 4           | 4           | 3      | 3                                      | 3           | 3      | 1                                              | 1           | 0      |
| mean                        | 4.04        | 4.91        | 5.21   | 3.95                                   | 4.94        | 5.21   | 4.30                                           | 4.86        | n.a.   |
| median                      | 4.36        | 4.86        | 5.21   | 4.43                                   | 4.94        | 5.21   | 4.30                                           | 4.86        | n.a.   |
| min                         | 2.86        | 4.35        | 4.89   | 2.86                                   | 4.35        | 4.89   | 4.30                                           | 4.86        | n.a.   |
| max                         | 4.55        | 5.52        | 5.43   | 4.55                                   | 5.52        | 5.43   | 4.30                                           | 4.86        | n.a.   |
| p25                         | 3.94        | 4.61        | 5.09   | 3.65                                   | 4.64        | 5.09   | n.a.                                           | n.a.        | n.a.   |
| p75                         | 4.43        | 5.19        | 5.32   | 4.46                                   | 5.23        | 5.32   | n.a.                                           | n.a.        | n.a.   |
| <b>CTX (ng/ml)</b>          |             |             |        |                                        |             |        |                                                |             |        |
| number of studies           | 5           | 4           | 2      | 4                                      | 3           | 2      | 1                                              | 1           | 0      |
| mean                        | 0.46        | 0.50        | 0.55   | 0.46                                   | 0.51        | 0.55   | 0.48                                           | 0.49        | n.a.   |
| median                      | 0.48        | 0.54        | 0.55   | 0.46                                   | 0.59        | 0.55   | 0.48                                           | 0.49        | n.a.   |
| min                         | 0.30        | 0.27        | 0.53   | 0.30                                   | 0.27        | 0.53   | 0.48                                           | 0.49        | n.a.   |
| max                         | 0.61        | 0.66        | 0.56   | 0.61                                   | 0.66        | 0.56   | 0.48                                           | 0.49        | n.a.   |
| p25                         | 0.43        | 0.43        | 0.53   | 0.40                                   | 0.43        | 0.54   | n.a.                                           | n.a.        | n.a.   |
| p75                         | 0.48        | 0.61        | 0.56   | 0.51                                   | 0.63        | 0.55   | n.a.                                           | n.a.        | n.a.   |
| <b>Osteocalcin (µg/l)</b>   |             |             |        |                                        |             |        |                                                |             |        |
| number of studies           | 4           | 4           | 4      | 4                                      | 4           | 4      | 0                                              | 0           | 0      |
| mean                        | 22.5        | 24.9        | 27.9   | 22.5                                   | 24.9        | 27.9   | n.a.                                           | n.a.        | n.a.   |
| median                      | 23.0        | 26.2        | 27.9   | 23.0                                   | 26.2        | 27.9   | n.a.                                           | n.a.        | n.a.   |
| min                         | 17.67       | 19.17       | 23.67  | 17.7                                   | 19.2        | 23.7   | n.a.                                           | n.a.        | n.a.   |
| max                         | 26.10       | 29.37       | 32.17  | 26.1                                   | 29.4        | 32.2   | n.a.                                           | n.a.        | n.a.   |
| p25                         | 21.7        | 22.7        | 25.8   | 21.7                                   | 22.7        | 25.8   | n.a.                                           | n.a.        | n.a.   |
| p75                         | 23.8        | 27.8        | 30.0   | 23.8                                   | 27.8        | 30.0   | n.a.                                           | n.a.        | n.a.   |
| <b>BMD I. spine (g/cm2)</b> |             |             |        |                                        |             |        |                                                |             |        |
| number of studies           | 4           | 4           | 1      | 3                                      | 3           | 1      | 1                                              | 1           | 0      |
| mean                        | 0.97        | 0.95        | 1.03   | 1.03                                   | 1.01        | 1.03   | 0.79                                           | 0.77        | n.a.   |
| median                      | 0.95        | 0.94        | 1.03   | 1.10                                   | 1.08        | 1.03   | 0.79                                           | 0.77        | n.a.   |
| min                         | 0.79        | 0.77        | 1.03   | 0.81                                   | 0.81        | 1.03   | 0.79                                           | 0.77        | n.a.   |
| max                         | 1.18        | 1.14        | 1.03   | 1.18                                   | 1.14        | 1.03   | 0.79                                           | 0.77        | n.a.   |
| p25                         | 0.80        | 0.80        | n.a.   | 0.95                                   | 0.94        | n.a.   | n.a.                                           | n.a.        | n.a.   |
| p75                         | 1.12        | 1.09        | n.a.   | 1.14                                   | 1.11        | n.a.   | n.a.                                           | n.a.        | n.a.   |

n.a. not assessed
